# Supplementary material for: Identification of Histone Lysine Acetoacetylation as a Dynamic Post‐Translational Modification Regulated by HBO1
Source: PubMed Central journal article supplement (PMC10477889; doi:10.1002/advs.202300032), 2023-06-29
Supplement: ADVS-10-2300032-s001.pdf [file ADVS-10-2300032-s001.pdf]

## Supporting Information

for *Adv. Sci.*, DOI 10.1002/adv.202300032

Identification of Histone Lysine Acetoacetylation as a Dynamic Post-Translational Modification Regulated by HBO1

*Yan Gao, Xinlei Sheng, Doudou Tan, SunJoo Kim, Soyoung Choi, Sanjita Paudel, Taeho Lee, Cong Yan, Minjia Tan, Kyu Min Kim, Sam Seok Cho, Sung Hwan Ki, He Huang\*, Yingming Zhao\* and Sangkyu Lee\**

**Figure S6. Representative MS<sup>2</sup> spectra of the identified 33 Kacac sites**

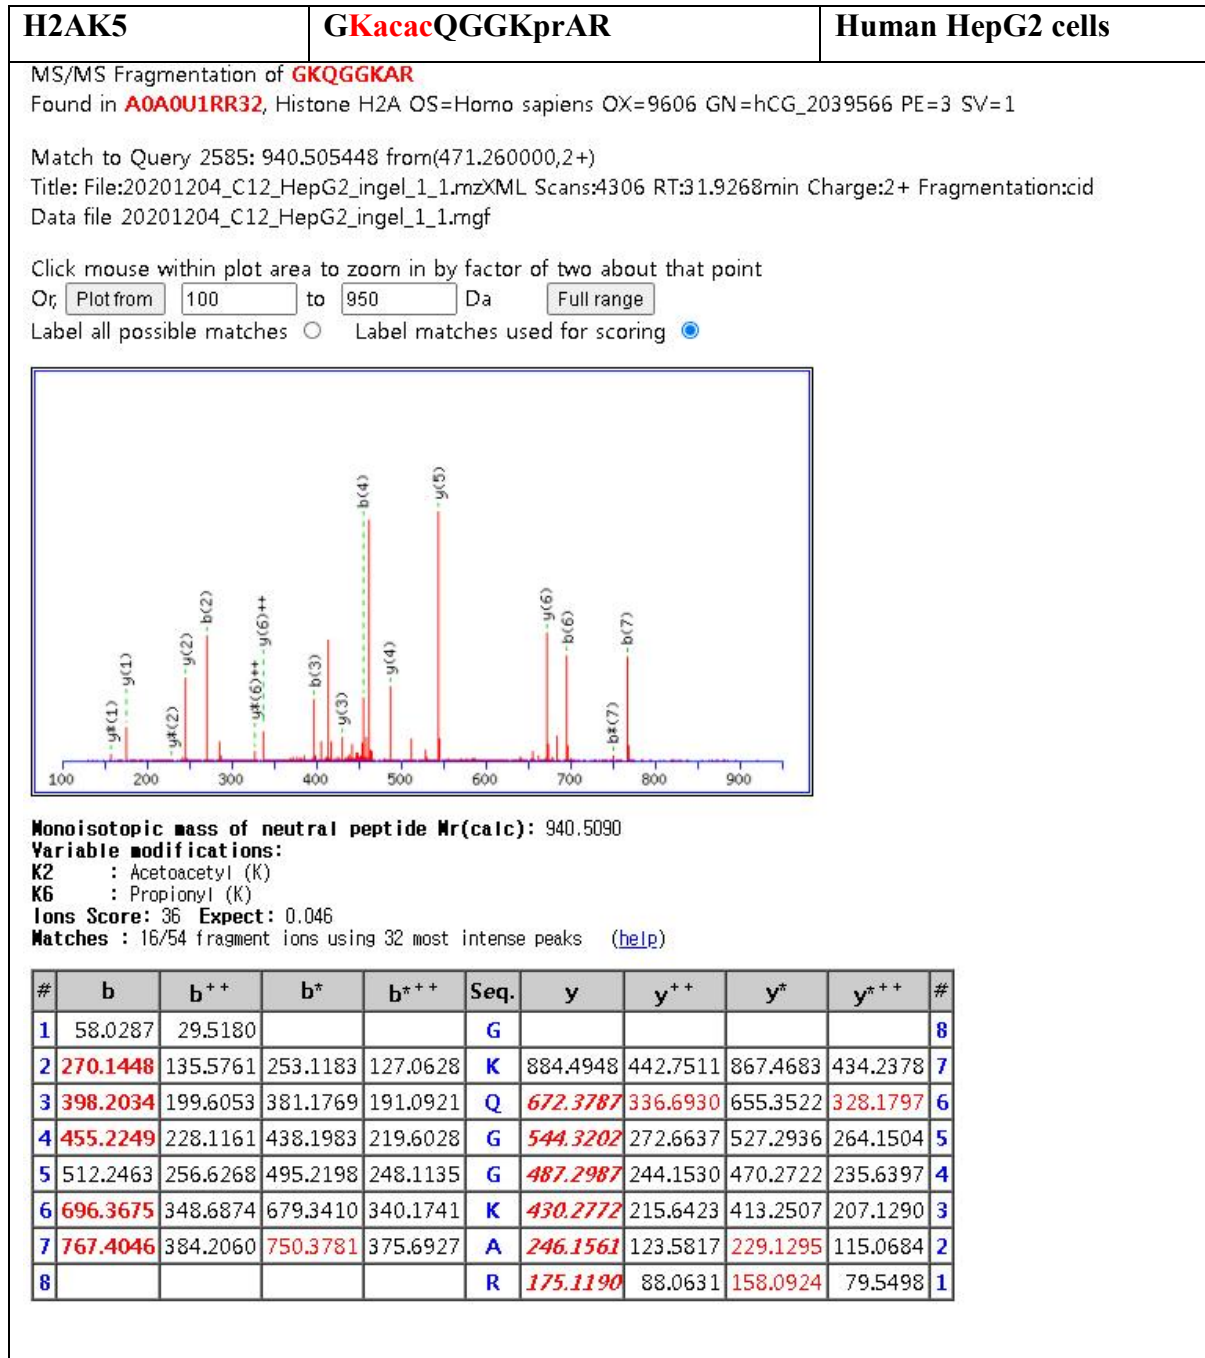

**H2AK36****KacacGNYSER****Human HepG2 cells**MS/MS Fragmentation of **KGNYSER**Found in **A0A0U1RR32**, Histone H2A OS=Homo sapiens OX=9606 GN=hCG\_2039566 PE=3 SV=1

Match to Query 2520: 936.426248 from(469.220400,2+)

Title: File:20201204\_C12\_HepG2\_ingel\_1\_1.mzXML Scans:5692 RT:37.0247min Charge:2+ Fragmentation:cid

Data file 20201204\_C12\_HepG2\_ingel\_1\_1.mgf

Click mouse within plot area to zoom in by factor of two about that point

Or, Plot from  to  Da Label all possible matches  Label matches used for scoring 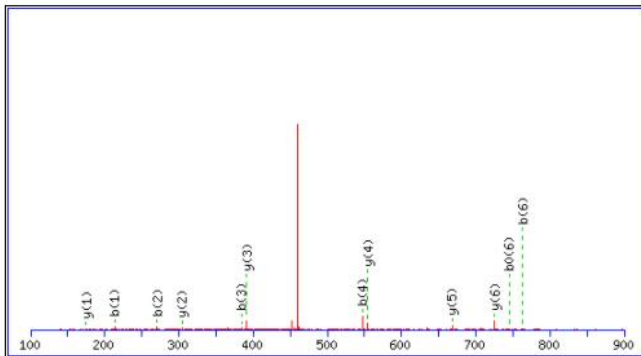Monoisotopic mass of neutral peptide **Mr(calc)**: 936.4301

Variable modifications:

K1 : Acetoacetyl (K)

Ions Score: 59 Expect: 8.5e-005

Matches : 12/62 fragment ions using 16 most intense peaks ([help](#))

| # | b               | b <sup>++</sup> | b <sup>*</sup> | b <sup>+++</sup> | b <sup>0</sup>  | b <sup>0++</sup> | Seq. | y               | y <sup>++</sup> | y <sup>*</sup> | y <sup>+++</sup> | y <sup>0</sup> | y <sup>0++</sup> | # |
|---|-----------------|-----------------|----------------|------------------|-----------------|------------------|------|-----------------|-----------------|----------------|------------------|----------------|------------------|---|
| 1 | <b>213.1234</b> | 107.0653        | 196.0968       | 98.5520          |                 |                  | K    |                 |                 |                |                  |                |                  | 7 |
| 2 | <b>270.1448</b> | 135.5761        | 253.1183       | 127.0628         |                 |                  | G    | <b>725.3213</b> | 363.1643        | 708.2947       | 354.6510         | 707.3107       | 354.1590         | 6 |
| 3 | <b>384.1878</b> | 192.5975        | 367.1612       | 184.0842         |                 |                  | N    | <b>668.2998</b> | 334.6536        | 651.2733       | 326.1403         | 650.2893       | 325.6483         | 5 |
| 4 | <b>547.2511</b> | 274.1292        | 530.2245       | 265.6159         |                 |                  | Y    | <b>554.2569</b> | 277.6321        | 537.2304       | 269.1188         | 536.2463       | 268.6268         | 4 |
| 5 | 634.2831        | 317.6452        | 617.2566       | 309.1319         | 616.2726        | 308.6399         | S    | <b>391.1936</b> | 196.1004        | 374.1670       | 187.5872         | 373.1830       | 187.0951         | 3 |
| 6 | <b>763.3257</b> | 382.1665        | 746.2992       | 373.6532         | <b>745.3151</b> | 373.1612         | E    | <b>304.1615</b> | 152.5844        | 287.1350       | 144.0711         | 286.1510       | 143.5791         | 2 |
| 7 |                 |                 |                |                  |                 |                  | R    | <b>175.1190</b> | 88.0631         | 158.0924       | 79.5498          |                |                  | 1 |

**H2AK95****NDEELN**K**acacLLGKpr****Human HepG2 cells**MS/MS Fragmentation of **NDEELN**K**LLGK**Found in **A0A0U1RR32**, Histone H2A OS=Homo sapiens OX=9606 GN=hCG\_2039566 PE=3 SV=1

Match to Query 11841: 1411.720048 from(706.867300,2+)

Title: File:20201204\_C12\_HepG2\_ingel\_3\_1.mzXML Scans:27534 RT:117.0000min Charge:2+ Fragmentation:cid

Data file 20201204\_C12\_HepG2\_ingel\_3\_1.mgf

Click mouse within plot area to zoom in by factor of two about that point

Or, Plot from  to  Da Label all possible matches  Label matches used for scoring 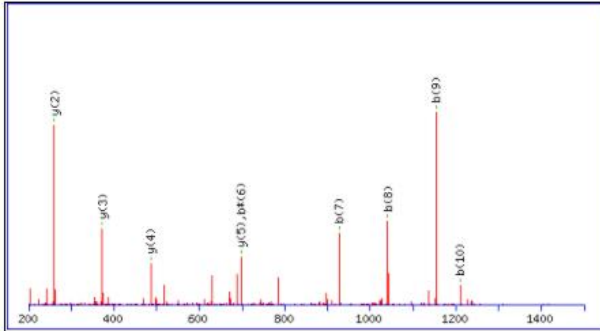Monoisotopic mass of neutral peptide  $M_r(\text{calc})$ : 1411.7194

Variable modifications:

K7 : Acetyloxytyl (K)

K11 : Propionyl (K)

Ions Score: 25 Expect: 0.18

Matches : 9/104 fragment ions using 13 most intense peaks ([help](#))

| #  | b                    | b <sup>++</sup> | b*        | b <sup>+++</sup> | b <sup>0</sup> | b <sup>0++</sup> | Seq | y                   | y <sup>++</sup> | y*        | y <sup>+++</sup> | y <sup>0</sup> | y <sup>0++</sup> | #  |
|----|----------------------|-----------------|-----------|------------------|----------------|------------------|-----|---------------------|-----------------|-----------|------------------|----------------|------------------|----|
| 1  | 115.0502             | 58.0287         | 98.0237   | 49.5155          |                |                  | N   |                     |                 |           |                  |                |                  | 11 |
| 2  | 230.0771             | 115.5422        | 213.0506  | 107.0289         | 212.0666       | 106.5369         | D   | 1298.6838           | 649.8455        | 1281.6573 | 641.3323         | 1280.6733      | 640.8403         | 10 |
| 3  | 359.1197             | 180.0635        | 342.0932  | 171.5502         | 341.1092       | 171.0582         | E   | 1183.6569           | 592.3321        | 1166.6303 | 583.8188         | 1165.6463      | 583.3268         | 9  |
| 4  | 488.1623             | 244.5848        | 471.1358  | 236.0715         | 470.1518       | 235.5795         | E   | 1054.6143           | 527.8108        | 1037.5877 | 519.2975         | 1036.6037      | 518.8055         | 8  |
| 5  | 601.2464             | 301.1268        | 584.2198  | 292.6136         | 583.2358       | 292.1216         | L   | 925.5717            | 463.2895        | 908.5451  | 454.7762         |                |                  | 7  |
| 6  | 715.2893             | 358.1483        | 698.2628  | 349.6350         | 697.2788       | 349.1430         | N   | 812.4876            | 406.7475        | 795.4611  | 398.2342         |                |                  | 6  |
| 7  | <del>927.4054</del>  | 464.2063        | 910.3789  | 455.6931         | 909.3949       | 455.2011         | K   | <del>698.4447</del> | 349.7260        | 681.4182  | 341.2127         |                |                  | 5  |
| 8  | <del>1040.4895</del> | 520.7484        | 1023.4629 | 512.2351         | 1022.4789      | 511.7431         | L   | <del>486.3286</del> | 243.6679        | 469.3021  | 235.1547         |                |                  | 4  |
| 9  | <del>1153.5735</del> | 577.2904        | 1136.5470 | 568.7771         | 1135.5630      | 568.2851         | L   | <del>373.2445</del> | 187.1259        | 356.2180  | 178.6126         |                |                  | 3  |
| 10 | <del>1210.5950</del> | 605.8011        | 1193.5685 | 597.2879         | 1192.5844      | 596.7959         | G   | <del>260.1605</del> | 130.5839        | 243.1339  | 122.0706         |                |                  | 2  |
| 11 |                      |                 |           |                  |                |                  | K   | 203.1390            | 102.0731        | 186.1125  | 93.5599          |                |                  | 1  |



**H2AK99****NDEELNKLLGKacac****Human HepG2 cells**MS/MS Fragmentation of **NDEELNKLLGK**Found in **A0A0U1RR32**, Histone H2A OS=Homo sapiens OX=9606 GN=hCG\_2039566 PE=3 SV=1

Match to Query 8405: 1355.692648 from(678.853600,2+)

Title: File:20201204\_C12\_HepG2\_ingel\_1\_1.mzXML Scans:16011 RT:73.7993min Charge:2+ Fragmentation:cid

Data file 20201204\_C12\_HepG2\_ingel\_1\_1.mgf

Click mouse within plot area to zoom in by factor of two about that point

Or, Plot from  to  Da Label all possible matches  Label matches used for scoring 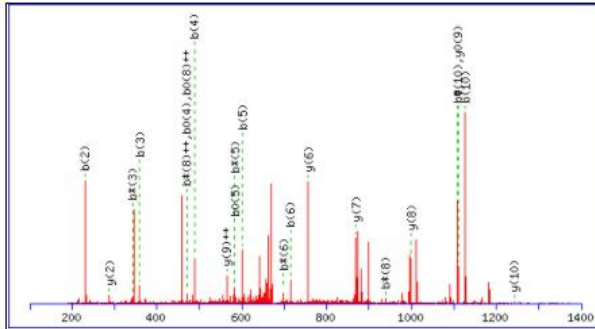Monoisotopic mass of neutral peptide  $M_r(\text{calc})$ : 1355.6932

## Variable modifications:

K11 : Acetylated (K)

Ions Score: 27 Expect: 1

Matches : 25/104 fragment ions using 45 most intense peaks ([help](#))

| #  | b                | b <sup>++</sup> | b <sup>*</sup>   | b <sup>*++</sup> | b <sup>0</sup>   | b <sup>0++</sup> | Seq | y                | y <sup>++</sup> | y <sup>*</sup> | y <sup>*++</sup> | y <sup>0</sup>   | y <sup>0++</sup> | #  |
|----|------------------|-----------------|------------------|------------------|------------------|------------------|-----|------------------|-----------------|----------------|------------------|------------------|------------------|----|
| 1  | 115.0502         | 58.0287         | 98.0237          | 49.5155          |                  |                  | N   |                  |                 |                |                  |                  |                  | 11 |
| 2  | <b>230.0771</b>  | 115.5422        | 213.0506         | 107.0289         | 212.0666         | 106.5369         | D   | <b>1242.6576</b> | 621.8324        | 1225.6311      | 613.3192         | 1224.6470        | 612.8272         | 10 |
| 3  | <b>359.1197</b>  | 180.0635        | <b>342.0932</b>  | 171.5502         | 341.1092         | 171.0582         | E   | 1127.6307        | <b>564.3190</b> | 1110.6041      | 555.8057         | <b>1109.6201</b> | 555.3137         | 9  |
| 4  | <b>488.1623</b>  | 244.5848        | 471.1358         | 236.0715         | <b>470.1518</b>  | 235.5795         | E   | <b>998.5881</b>  | 499.7977        | 981.5615       | 491.2844         | 980.5775         | 490.7924         | 8  |
| 5  | <b>601.2464</b>  | 301.1268        | <b>584.2198</b>  | 292.6136         | <b>583.2358</b>  | 292.1216         | L   | <b>869.5455</b>  | 435.2764        | 852.5189       | 426.7631         |                  |                  | 7  |
| 6  | <b>715.2893</b>  | 358.1483        | <b>698.2628</b>  | 349.6350         | 697.2788         | 349.1430         | N   | <b>756.4614</b>  | 378.7343        | 739.4349       | 370.2211         |                  |                  | 6  |
| 7  | 843.3843         | 422.1958        | 826.3577         | 413.6825         | 825.3737         | 413.1905         | K   | 642.4185         | 321.7129        | 625.3919       | 313.1996         |                  |                  | 5  |
| 8  | 956.4684         | 478.7378        | <b>939.4418</b>  | <b>470.2245</b>  | 938.4578         | <b>469.7325</b>  | L   | 514.3235         | 257.6654        | 497.2970       | 249.1521         |                  |                  | 4  |
| 9  | 1069.5524        | 535.2798        | 1052.5259        | 526.7666         | 1051.5418        | 526.2746         | L   | 401.2395         | 201.1234        | 384.2129       | 192.6101         |                  |                  | 3  |
| 10 | <b>1126.5739</b> | 563.7906        | <b>1109.5473</b> | 555.2773         | <b>1108.5633</b> | 554.7853         | G   | <b>288.1554</b>  | 144.5813        | 271.1288       | 136.0681         |                  |                  | 2  |
| 11 |                  |                 |                  |                  |                  |                  | K   | 231.1339         | 116.0706        | 214.1074       | 107.5573         |                  |                  | 1  |

H2AK118

ATIAGGGVIPHIHKacSLIGKacacKac

Rat liver

MS/MS Fragmentation of **ATIAGGGVIPHIHKS**LGK

Found in **A0A0A0MXW3**, **Histone H2A** OS=Rattus norvegicus OX=10116 GN=H2afz PE=3 SV=1

Match to Query 8799: 2164.270096 from(542.074800,4+)

Title: File:20200819\_Histone\_IP.mzXML Scans:13266 RT:53.8495min Charge:4+

Fragmentation:cid

Data file 20200819\_Histone\_IP\_liver.mgf

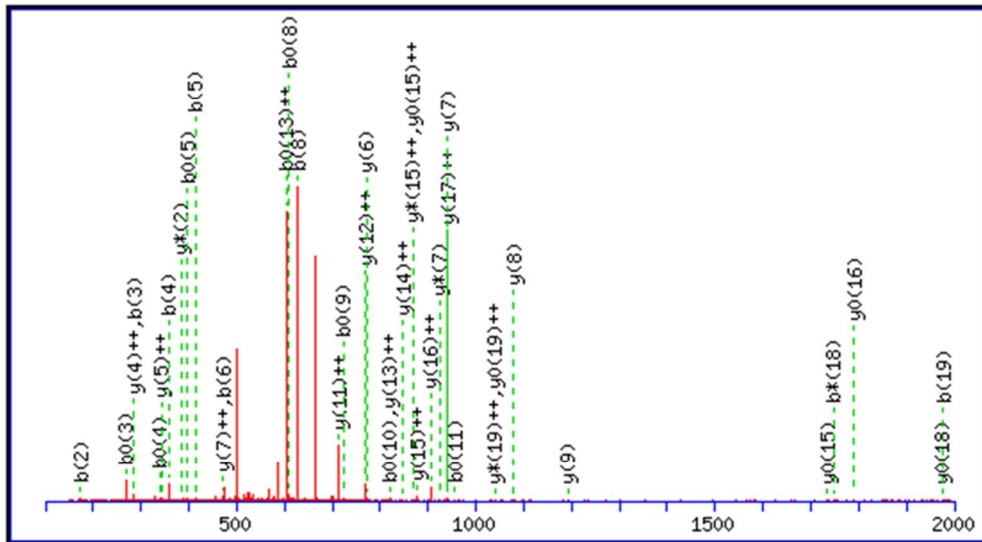

**Monoisotopic mass of neutral peptide Mr(calc): 2164.2368**

**Variable modifications: K14 : Acetyl (K) K19 : Acetoacetyl (K) K20 : Acetyl (K)**

**Ions Score: 21 Expect: 0.16**

**Matches : 39/190 fragment ions using 126 most intense peaks**

| #  | b                | b <sup>++</sup> | b <sup>*</sup>   | b <sup>+++</sup> | b <sup>0</sup>  | b <sup>0++</sup> | Seq. | y                | y <sup>++</sup> | y <sup>*</sup>  | y <sup>+++</sup> | y <sup>0</sup>   | y <sup>0++</sup> | #  |
|----|------------------|-----------------|------------------|------------------|-----------------|------------------|------|------------------|-----------------|-----------------|------------------|------------------|------------------|----|
| 1  | 72.0444          | 36.5258         |                  |                  |                 |                  | A    |                  |                 |                 |                  |                  |                  | 20 |
| 2  | <b>173.0921</b>  | 87.0497         |                  |                  | 155.0815        | 78.0444          | T    | 2094.2070        | 1047.6071       | 2077.1804       | <b>1039.0939</b> | 2076.1964        | <b>1038.6018</b> | 19 |
| 3  | <b>286.1761</b>  | 143.5917        |                  |                  | <b>268.1656</b> | 134.5864         | I    | 1993.1593        | 997.0833        | 1976.1328       | 988.5700         | <b>1975.1487</b> | 988.0780         | 18 |
| 4  | <b>357.2132</b>  | 179.1103        |                  |                  | <b>339.2027</b> | 170.1050         | A    | 1880.0752        | <b>940.5413</b> | 1863.0487       | 932.0280         | 1862.0647        | 931.5360         | 17 |
| 5  | <b>414.2347</b>  | 207.6210        |                  |                  | <b>396.2241</b> | 198.6157         | G    | 1809.0381        | <b>905.0227</b> | 1792.0116       | 896.5094         | <b>1791.0276</b> | 896.0174         | 16 |
| 6  | <b>471.2562</b>  | 236.1317        |                  |                  | 453.2456        | 227.1264         | G    | 1752.0167        | <b>876.5120</b> | 1734.9901       | <b>867.9987</b>  | <b>1734.0061</b> | <b>867.5067</b>  | 15 |
| 7  | 528.2776         | 264.6425        |                  |                  | 510.2671        | 255.6372         | G    | 1694.9952        | <b>848.0012</b> | 1677.9687       | 839.4880         | 1676.9846        | 838.9960         | 14 |
| 8  | <b>627.3461</b>  | 314.1767        |                  |                  | <b>609.3355</b> | 305.1714         | V    | 1637.9737        | <b>819.4905</b> | 1620.9472       | 810.9772         | 1619.9632        | 810.4852         | 13 |
| 9  | 740.4301         | 370.7187        |                  |                  | <b>722.4196</b> | 361.7134         | I    | 1538.9053        | <b>769.9563</b> | 1521.8788       | 761.4430         | 1520.8948        | 760.9510         | 12 |
| 10 | 837.4829         | 419.2451        |                  |                  | <b>819.4723</b> | 410.2398         | P    | 1425.8213        | <b>713.4143</b> | 1408.7947       | 704.9010         | 1407.8107        | 704.4090         | 11 |
| 11 | 974.5418         | 487.7745        |                  |                  | <b>956.5312</b> | 478.7693         | H    | 1328.7685        | 664.8879        | 1311.7419       | 656.3746         | 1310.7579        | 655.8826         | 10 |
| 12 | 1087.6259        | 544.3166        |                  |                  | 1069.6153       | 535.3113         | I    | <b>1191.7096</b> | 596.3584        | 1174.6830       | 587.8452         | 1173.6990        | 587.3531         | 9  |
| 13 | 1224.6848        | 612.8460        |                  |                  | 1206.6742       | <b>603.8407</b>  | H    | <b>1078.6255</b> | 539.8164        | 1061.5990       | 531.3031         | 1060.6150        | 530.8111         | 8  |
| 14 | 1394.7903        | 697.8988        | 1377.7637        | 689.3855         | 1376.7797       | 688.8935         | K    | <b>941.5666</b>  | <b>471.2869</b> | <b>924.5401</b> | 462.7737         | 923.5560         | 462.2817         | 7  |
| 15 | 1481.8223        | 741.4148        | 1464.7958        | 732.9015         | 1463.8118       | 732.4095         | S    | <b>771.4611</b>  | 386.2342        | 754.4345        | 377.7209         | 753.4505         | 377.2289         | 6  |
| 16 | 1594.9064        | 797.9568        | 1577.8798        | 789.4436         | 1576.8958       | 788.9516         | L    | 684.4291         | <b>342.7182</b> | 667.4025        | 334.2049         |                  |                  | 5  |
| 17 | 1707.9905        | 854.4989        | 1690.9639        | 845.9856         | 1689.9799       | 845.4936         | I    | 571.3450         | <b>286.1761</b> | 554.3184        | 277.6629         |                  |                  | 4  |
| 18 | 1765.0119        | 883.0096        | <b>1747.9854</b> | 874.4963         | 1747.0014       | 874.0043         | G    | 458.2609         | 229.6341        | 441.2344        | 221.1208         |                  |                  | 3  |
| 19 | <b>1977.1280</b> | 989.0676        | 1960.1015        | 980.5544         | 1959.1174       | 980.0624         | K    | 401.2395         | 201.1234        | <b>384.2129</b> | 192.6101         |                  |                  | 2  |
| 20 |                  |                 |                  |                  |                 |                  | K    | 189.1234         | 95.0653         | 172.0968        | 86.5520          |                  |                  | 1  |

H2AK119

ATIAGGGVIPHHKacSLIGKacKacac

Rat liver

MS/MS Fragmentation of **ATIAGGGVIPHHKSLIGKK**

Found in **A0A0A0MXW3**, **Histone H2A** OS=Rattus norvegicus OX=10116 GN=H2afz PE=3 SV=1

Match to Query 7273: 2164.273696 from(542.075700,4+)

Title: File:20200819\_Histone\_IP\_Kidney.mzXML Scans:11454 RT:51.3880min Charge:4+ Fragmentation:cid

Data file 20200819\_Histone\_IP\_Kidney.mgf

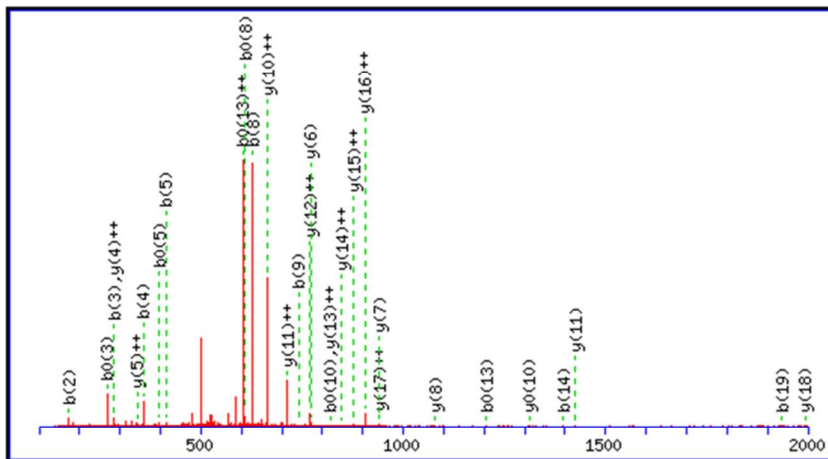

Monoisotopic mass of neutral peptide Mr(calc): 2164.2368

Variable modifications: **K14** : Acetyl (K) **K19** : Acetyl (K) **K20** : Acetoacetyl (K)

Ions Score: 31 Expect: 0.038

Matches : 30/190 fragment ions using 86 most intense peaks

| #  | b                | b <sup>++</sup> | b <sup>+</sup> | b <sup>+++</sup> | b <sup>0</sup>   | b <sup>0++</sup> | Seq. | y                | y <sup>++</sup> | y <sup>+</sup> | y <sup>+++</sup> | y <sup>0</sup>   | y <sup>0++</sup> | #  |
|----|------------------|-----------------|----------------|------------------|------------------|------------------|------|------------------|-----------------|----------------|------------------|------------------|------------------|----|
| 1  | 72.0444          | 36.5258         |                |                  |                  |                  | A    |                  |                 |                |                  |                  |                  | 20 |
| 2  | <b>173.0921</b>  | 87.0497         |                |                  | 155.0815         | 78.0444          | T    | 2094.2070        | 1047.6071       | 2077.1804      | 1039.0939        | 2076.1964        | 1038.6018        | 19 |
| 3  | <b>286.1761</b>  | 143.5917        |                |                  | <b>268.1656</b>  | 134.5864         | I    | <b>1993.1593</b> | 997.0833        | 1976.1328      | 988.5700         | 1975.1487        | 988.0780         | 18 |
| 4  | <b>357.2132</b>  | 179.1103        |                |                  | 339.2027         | 170.1050         | A    | 1880.0752        | <b>940.5413</b> | 1863.0487      | 932.0280         | 1862.0647        | 931.5360         | 17 |
| 5  | <b>414.2347</b>  | 207.6210        |                |                  | <b>396.2241</b>  | 198.6157         | G    | 1809.0381        | <b>905.0227</b> | 1792.0116      | 896.5094         | 1791.0276        | 896.0174         | 16 |
| 6  | 471.2562         | 236.1317        |                |                  | 453.2456         | 227.1264         | G    | 1752.0167        | <b>876.5120</b> | 1734.9901      | 867.9987         | 1734.0061        | 867.5067         | 15 |
| 7  | 528.2776         | 264.6425        |                |                  | 510.2671         | 255.6372         | G    | 1694.9952        | <b>848.0012</b> | 1677.9687      | 839.4880         | 1676.9846        | 838.9960         | 14 |
| 8  | <b>627.3461</b>  | 314.1767        |                |                  | <b>609.3355</b>  | 305.1714         | V    | 1637.9737        | <b>819.4905</b> | 1620.9472      | 810.9772         | 1619.9632        | 810.4852         | 13 |
| 9  | <b>740.4301</b>  | 370.7187        |                |                  | 722.4196         | 361.7134         | I    | 1538.9053        | <b>769.9563</b> | 1521.8788      | 761.4430         | 1520.8948        | 760.9510         | 12 |
| 10 | 837.4829         | 419.2451        |                |                  | <b>819.4723</b>  | 410.2398         | P    | <b>1425.8213</b> | <b>713.4143</b> | 1408.7947      | 704.9010         | 1407.8107        | 704.4090         | 11 |
| 11 | 974.5418         | 487.7745        |                |                  | 956.5312         | 478.7693         | H    | 1328.7685        | <b>664.8879</b> | 1311.7419      | 656.3746         | <b>1310.7579</b> | 655.8826         | 10 |
| 12 | 1087.6259        | 544.3166        |                |                  | 1069.6153        | 535.3113         | I    | 1191.7096        | 596.3584        | 1174.6830      | 587.8452         | 1173.6990        | 587.3531         | 9  |
| 13 | 1224.6848        | 612.8460        |                |                  | <b>1206.6742</b> | <b>603.8407</b>  | H    | <b>1078.6255</b> | 539.8164        | 1061.5990      | 531.3031         | 1060.6150        | 530.8111         | 8  |
| 14 | <b>1394.7903</b> | 697.8988        | 1377.7637      | 689.3855         | 1376.7797        | 688.8935         | K    | <b>941.5666</b>  | 471.2869        | 924.5401       | 462.7737         | 923.5560         | 462.2817         | 7  |
| 15 | 1481.8223        | 741.4148        | 1464.7958      | 732.9015         | 1463.8118        | 732.4095         | S    | <b>771.4611</b>  | 386.2342        | 754.4345       | 377.7209         | 753.4505         | 377.2289         | 6  |
| 16 | 1594.9064        | 797.9568        | 1577.8798      | 789.4436         | 1576.8958        | 788.9516         | L    | 684.4291         | <b>342.7182</b> | 667.4025       | 334.2049         |                  |                  | 5  |
| 17 | 1707.9905        | 854.4989        | 1690.9639      | 845.9856         | 1689.9799        | 845.4936         | I    | 571.3450         | <b>286.1761</b> | 554.3184       | 277.6629         |                  |                  | 4  |
| 18 | 1765.0119        | 883.0096        | 1747.9854      | 874.4963         | 1747.0014        | 874.0043         | G    | 458.2609         | 229.6341        | 441.2344       | 221.1208         |                  |                  | 3  |
| 19 | <b>1935.1174</b> | 968.0624        | 1918.0909      | 959.5491         | 1917.1069        | 959.0571         | K    | 401.2395         | 201.1234        | 384.2129       | 192.6101         |                  |                  | 2  |
| 20 |                  |                 |                |                  |                  |                  | K    | 231.1339         | 116.0706        | 214.1074       | 107.5573         |                  |                  | 1  |



|                |                                           |                          |
|----------------|-------------------------------------------|--------------------------|
| <b>H2AK125</b> | <b>VTIAQGGVLPNIQAVLLPKmeKmeTESHHKacac</b> | <b>Human HepG2 cells</b> |
|----------------|-------------------------------------------|--------------------------|

MS/MS Fragmentation of **VTIAQGGVLPNIQAVLLPKTESHHK**  
 Found in **ADA0ULRR32**, Histone H2A OS=Homo sapiens OX=9606 GN=hCG\_2039566 PE=3 SV=1

Match to Query 20230: 2889.642096 from(723.417800,4+)  
 Title: File:20201204\_C12\_HepG2\_ingel\_1\_1.mzXML Scans:20376 RT:89.3377min Charge:4+ Fragmentation:cid  
 Data file 20201204\_C12\_HepG2\_ingel\_1\_1.mgf

Click mouse within plot area to zoom in by factor of two about that point  
 Or, Plot from  to  Da   
 Label all possible matches  Label matches used for scoring

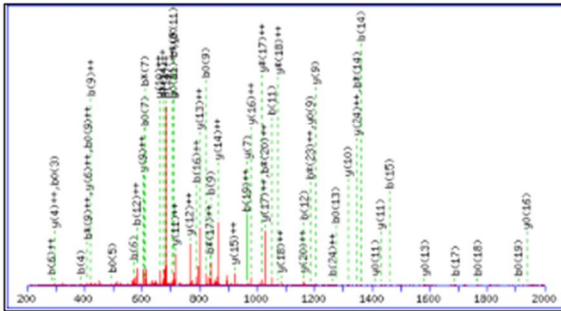

Monoisotopic mass of neutral peptide M<sub>r</sub>(calc): 2889.6440  
 Variable modifications:  
 K10 : Methyli (KR)  
 K20 : Methyli (KR)  
 K26 : Acetylacetyl (K)  
 Ions Score: 84 Expect: 0.0018  
 Matches: 68/284 fragment ions using 161 most intense peaks ([help](#))

| #  | b         | b <sup>++</sup> | b <sup>*</sup> | b <sup>+++</sup> | b <sup>0</sup> | b <sup>0++</sup> | Seq | y         | y <sup>++</sup> | y <sup>*</sup> | y <sup>+++</sup> | y <sup>0</sup> | y <sup>0++</sup> | #  |
|----|-----------|-----------------|----------------|------------------|----------------|------------------|-----|-----------|-----------------|----------------|------------------|----------------|------------------|----|
| 1  | 100.0757  | 50.5415         |                |                  |                |                  | V   |           |                 |                |                  |                |                  | 26 |
| 2  | 201.1234  | 101.0653        |                |                  | 183.1128       | 92.0600          | T   | 2791.5829 | 1396.2951       | 2774.5563      | 1387.7818        | 2773.5723      | 1387.2898        | 25 |
| 3  | 314.2074  | 157.6074        |                |                  | 296.1969       | 148.6021         | I   | 2690.5352 | 1345.7712       | 2673.5086      | 1337.2580        | 2672.5246      | 1336.7660        | 24 |
| 4  | 385.2445  | 193.1259        |                |                  | 367.2340       | 184.1206         | A   | 2577.4511 | 1289.2292       | 2560.4246      | 1280.7159        | 2559.4406      | 1280.2239        | 23 |
| 5  | 513.3031  | 257.1552        | 496.2766       | 248.6419         | 495.2926       | 248.1499         | Q   | 2506.4140 | 1253.7106       | 2489.3875      | 1245.1974        | 2488.4035      | 1244.7054        | 22 |
| 6  | 570.3246  | 285.6659        | 553.2980       | 277.1527         | 552.3140       | 276.6607         | G   | 2378.3554 | 1189.6814       | 2361.3289      | 1181.1681        | 2360.3449      | 1180.6761        | 21 |
| 7  | 627.3461  | 314.1767        | 610.3195       | 305.6634         | 609.3355       | 305.1714         | G   | 2321.3340 | 1161.1706       | 2304.3074      | 1152.6574        | 2303.3234      | 1152.1653        | 20 |
| 8  | 726.4145  | 363.7109        | 709.3879       | 355.1976         | 708.4039       | 354.7056         | V   | 2264.3125 | 1132.6599       | 2247.2860      | 1124.1466        | 2246.3019      | 1123.6546        | 19 |
| 9  | 839.4985  | 420.2529        | 822.4720       | 411.7396         | 821.4880       | 411.2476         | L   | 2165.2441 | 1083.1257       | 2148.2176      | 1074.6124        | 2147.2335      | 1074.1204        | 18 |
| 10 | 936.5513  | 468.7793        | 919.5247       | 460.2660         | 918.5407       | 459.7740         | P   | 2052.1600 | 1026.5837       | 2035.1335      | 1018.0704        | 2034.1495      | 1017.5784        | 17 |
| 11 | 1050.5942 | 525.8007        | 1033.5677      | 517.2875         | 1032.5837      | 516.7955         | N   | 1955.1073 | 978.0573        | 1938.0807      | 969.5440         | 1937.0967      | 969.0520         | 16 |
| 12 | 1163.6783 | 582.3428        | 1146.6517      | 573.8295         | 1145.6677      | 573.3375         | I   | 1841.0643 | 921.0358        | 1824.0378      | 912.5225         | 1823.0538      | 912.0305         | 15 |
| 13 | 1291.7369 | 646.3721        | 1274.7103      | 637.8588         | 1273.7263      | 637.3668         | Q   | 1727.9803 | 864.4938        | 1710.9537      | 855.9805         | 1709.9697      | 855.4885         | 14 |
| 14 | 1362.7740 | 681.8906        | 1345.7474      | 673.3774         | 1344.7634      | 672.8853         | A   | 1599.9217 | 800.4645        | 1582.8952      | 791.9512         | 1581.9111      | 791.4592         | 13 |
| 15 | 1461.8424 | 731.4248        | 1444.8158      | 722.9116         | 1443.8318      | 722.4196         | V   | 1528.8846 | 764.9459        | 1511.8580      | 756.4327         | 1510.8740      | 755.9406         | 12 |
| 16 | 1574.9265 | 787.9669        | 1557.8999      | 779.4536         | 1556.9159      | 778.9616         | L   | 1429.8162 | 715.4117        | 1412.7896      | 706.8985         | 1411.8056      | 706.4064         | 11 |
| 17 | 1688.0105 | 844.5089        | 1670.9840      | 835.9956         | 1670.0000      | 835.5036         | L   | 1316.7321 | 658.8697        | 1299.7056      | 650.3564         | 1298.7215      | 649.8644         | 10 |
| 18 | 1785.0633 | 893.0353        | 1768.0367      | 884.5220         | 1767.0527      | 884.0300         | P   | 1203.6480 | 602.3277        | 1186.6215      | 593.8144         | 1185.6375      | 593.3224         | 9  |
| 19 | 1927.1739 | 964.0906        | 1910.1473      | 955.5773         | 1909.1633      | 955.0853         | K   | 1106.5953 | 553.8013        | 1089.5687      | 545.2880         | 1088.5847      | 544.7960         | 8  |
| 20 | 2069.2845 | 1035.1459       | 2052.2580      | 1026.6326        | 2051.2739      | 1026.1406        | K   | 964.4847  | 482.7460        | 947.4581       | 474.2327         | 946.4741       | 473.7407         | 7  |
| 21 | 2170.3322 | 1085.6697       | 2153.3056      | 1077.1565        | 2152.3216      | 1076.6644        | T   | 822.3741  | 411.6907        | 805.3475       | 403.1774         | 804.3635       | 402.6854         | 6  |
| 22 | 2299.3748 | 1150.1910       | 2282.3482      | 1141.6778        | 2281.3642      | 1141.1857        | E   | 721.3264  | 361.1668        | 704.2998       | 352.6536         | 703.3158       | 352.1615         | 5  |
| 23 | 2386.4068 | 1193.7070       | 2369.3803      | 1185.1938        | 2368.3962      | 1184.7018        | S   | 592.2838  | 296.6455        | 575.2572       | 288.1323         | 574.2732       | 287.6402         | 4  |
| 24 | 2523.4657 | 1262.2365       | 2506.4392      | 1253.7232        | 2505.4552      | 1253.2312        | H   | 505.2518  | 253.1295        | 488.2252       | 244.6162         |                |                  | 3  |
| 25 | 2660.5246 | 1330.7660       | 2643.4981      | 1322.2527        | 2642.5141      | 1321.7607        | H   | 368.1928  | 184.6001        | 351.1663       | 176.0868         |                |                  | 2  |
| 26 |           |                 |                |                  |                |                  | K   | 231.1339  | 116.0706        | 214.1074       | 107.5573         |                |                  | 1  |

**H2AK127****KprTESHHKVKacac****Rat liver****MS/MS Fragmentation of KTESHHKVK**Found in **MORDM4**, Histone H2A OS=Rattus norvegicus OX=10116 GN=LOC680322 PE=3 SV=1

Match to Query 3046: 1232.654248 from(617.334400,2+)

Title: File:20200819\_Histone\_IP.mzXML Scans:1001 RT:6.0979min Charge:2+

Fragmentation:cid

Data file 20200819\_Histone\_IP\_liver.mgf

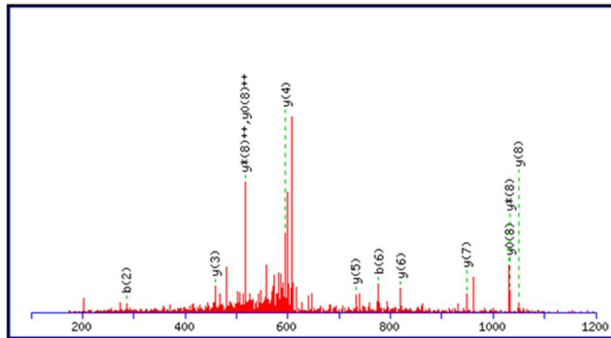

**Monoisotopic mass of neutral peptide Mr(calc): 1232.6513 Variable modifications: K1 : Propionyl (K) K9 : Acetoacetyl (K) Ions Score: 24 Expect: 1.2 Matches : 12/84 fragment ions using 33 most intense peaks**

| # | b               | b <sup>++</sup> | b <sup>*</sup> | b <sup>+++</sup> | b <sup>0</sup> | b <sup>0++</sup> | Seq. | y                | y <sup>++</sup> | y <sup>*</sup>   | y <sup>+++</sup> | y <sup>0</sup>   | y <sup>0++</sup> | # |
|---|-----------------|-----------------|----------------|------------------|----------------|------------------|------|------------------|-----------------|------------------|------------------|------------------|------------------|---|
| 1 | 185.1285        | 93.0679         | 168.1019       | 84.5546          |                |                  | K    |                  |                 |                  |                  |                  |                  | 9 |
| 2 | <b>286.1761</b> | 143.5917        | 269.1496       | 135.0784         | 268.1656       | 134.5864         | T    | <b>1049.5374</b> | 525.2724        | <b>1032.5109</b> | <b>516.7591</b>  | <b>1031.5269</b> | <b>516.2671</b>  | 8 |
| 3 | 415.2187        | 208.1130        | 398.1922       | 199.5997         | 397.2082       | 199.1077         | E    | <b>948.4898</b>  | 474.7485        | 931.4632         | 466.2352         | 930.4792         | 465.7432         | 7 |
| 4 | 502.2508        | 251.6290        | 485.2242       | 243.1157         | 484.2402       | 242.6237         | S    | <b>819.4472</b>  | 410.2272        | 802.4206         | 401.7139         | 801.4366         | 401.2219         | 6 |
| 5 | 639.3097        | 320.1585        | 622.2831       | 311.6452         | 621.2991       | 311.1532         | H    | <b>732.4151</b>  | 366.7112        | 715.3886         | 358.1979         |                  |                  | 5 |
| 6 | <b>776.3686</b> | 388.6879        | 759.3420       | 380.1747         | 758.3580       | 379.6826         | H    | <b>595.3562</b>  | 298.1817        | 578.3297         | 289.6685         |                  |                  | 4 |
| 7 | 904.4635        | 452.7354        | 887.4370       | 444.2221         | 886.4530       | 443.7301         | K    | <b>458.2973</b>  | 229.6523        | 441.2708         | 221.1390         |                  |                  | 3 |
| 8 | 1003.5320       | 502.2696        | 986.5054       | 493.7563         | 985.5214       | 493.2643         | V    | 330.2023         | 165.6048        | 313.1758         | 157.0915         |                  |                  | 2 |
| 9 |                 |                 |                |                  |                |                  | K    | 231.1339         | 116.0706        | 214.1074         | 107.5573         |                  |                  | 1 |

**H2BK11****SAPAPKacacKGSK****Human HepG2 cells**MS/MS Fragmentation of **SAPAPKKGSK**Found in **O60814**, Histone H2B type 1-K OS=Homo sapiens OX=9606 GN=HIST1H2BK PE=1 SV=3

Match to Query 5533: 1053.581448 from(527.798000,2+)

Title: File:20201204\_C12\_HepG2\_ingel\_3\_1.mzXML Scans:1712 RT:18.1012min Charge:2+ Fragmentation:cid

Data file 20201204\_C12\_HepG2\_ingel\_3\_1.mgf

Click mouse within plot area to zoom in by factor of two about that point

Or, Plot from  to  Da Label all possible matches  Label matches used for scoring 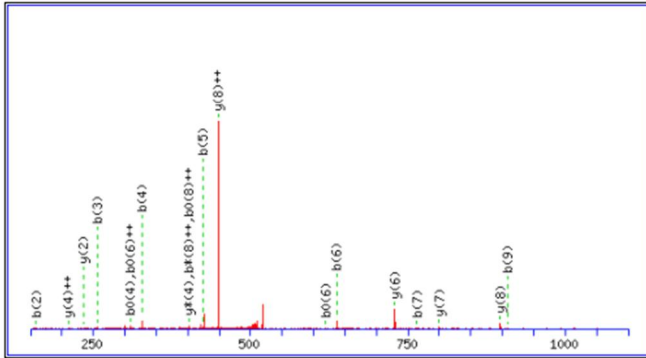

Monoisotopic mass of neutral peptide Mr(calc): 1053.5818

Variable modifications:

K6 : Acetoacetyl (K)

Ions Score: 28 Expect: 0.075

Matches : 19/96 fragment ions using 54 most intense peaks ([help](#))

| #  | b               | b <sup>++</sup> | b <sup>*</sup> | b <sup>+++</sup> | b <sup>0</sup>  | b <sup>0++</sup> | Seq. | y               | y <sup>++</sup> | y <sup>*</sup>  | y <sup>+++</sup> | y <sup>0</sup> | y <sup>0++</sup> | #  |
|----|-----------------|-----------------|----------------|------------------|-----------------|------------------|------|-----------------|-----------------|-----------------|------------------|----------------|------------------|----|
| 1  | 88.0393         | 44.5233         |                |                  | 70.0287         | 35.5180          | S    |                 |                 |                 |                  |                |                  | 10 |
| 2  | <b>159.0764</b> | 80.0418         |                |                  | 141.0659        | 71.0366          | A    | 967.5571        | 484.2822        | 950.5306        | 475.7689         | 949.5465       | 475.2769         | 9  |
| 3  | <b>256.1292</b> | 128.5682        |                |                  | 238.1186        | 119.5629         | P    | <b>896.5200</b> | <b>448.7636</b> | 879.4934        | 440.2504         | 878.5094       | 439.7584         | 8  |
| 4  | <b>327.1663</b> | 164.0868        |                |                  | <b>309.1557</b> | 155.0815         | A    | <b>799.4672</b> | 400.2373        | 782.4407        | 391.7240         | 781.4567       | 391.2320         | 7  |
| 5  | <b>424.2191</b> | 212.6132        |                |                  | 406.2085        | 203.6079         | P    | <b>728.4301</b> | 364.7187        | 711.4036        | 356.2054         | 710.4195       | 355.7134         | 6  |
| 6  | <b>636.3352</b> | 318.6712        | 619.3086       | 310.1579         | <b>618.3246</b> | <b>309.6659</b>  | K    | 631.3774        | 316.1923        | 614.3508        | 307.6790         | 613.3668       | 307.1870         | 5  |
| 7  | <b>764.4301</b> | 382.7187        | 747.4036       | 374.2054         | 746.4195        | 373.7134         | K    | 419.2613        | <b>210.1343</b> | <b>402.2347</b> | 201.6210         | 401.2507       | 201.1290         | 4  |
| 8  | 821.4516        | 411.2294        | 804.4250       | <b>402.7162</b>  | 803.4410        | <b>402.2241</b>  | G    | 291.1663        | 146.0868        | 274.1397        | 137.5735         | 273.1557       | 137.0815         | 3  |
| 9  | <b>908.4836</b> | 454.7454        | 891.4571       | 446.2322         | 890.4730        | 445.7402         | S    | <b>234.1448</b> | 117.5761        | 217.1183        | 109.0628         | 216.1343       | 108.5708         | 2  |
| 10 |                 |                 |                |                  |                 |                  | K    | 147.1128        | 74.0600         | 130.0863        | 65.5468          |                |                  | 1  |

**H2BK16****KacacAVTKacAQK****Human HepG2 cells**MS/MS Fragmentation of **KAVTKAQK**Found in **O60814**, Histone H2B type 1-K OS=Homo sapiens OX=9606 GN=HIST1H2BK PE=1 SV=3

Match to Query 4497: 998.576448 from(500.295500,2+)

Title: File:20201204\_C12\_HepG2\_ingel\_3\_1.mzXML Scans:8281 RT:43.4923min Charge:2+ Fragmentation:cid

Data file 20201204\_C12\_HepG2\_ingel\_3\_1.mgf

Click mouse within plot area to zoom in by factor of two about that point

Or Plot from  to  Da Label all possible matches  Label matches used for scoring 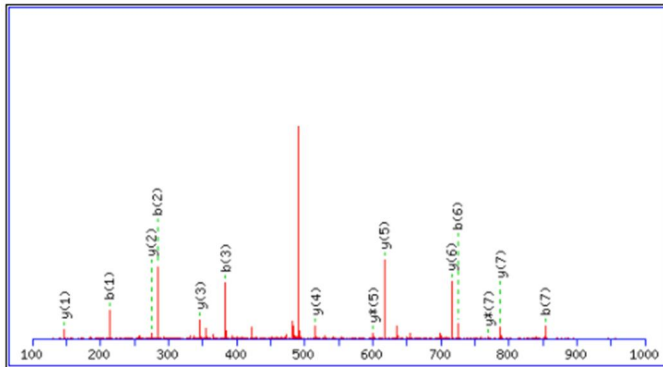Monoisotopic mass of neutral peptide **Mr(calc)**: 998.5760

Variable modifications:

K1 : Acetoacetyl (K)

K5 : Acetyl (K)

Ions Score: 54 Expect: 0.0022

Matches : 14/70 fragment ions using 26 most intense peaks ([help](#))

| # | b               | b <sup>++</sup> | b <sup>+</sup> | b <sup>+++</sup> | b <sup>0</sup> | b <sup>0++</sup> | Seq. | y               | y <sup>++</sup> | y <sup>+</sup>  | y <sup>+++</sup> | y <sup>0</sup> | y <sup>0++</sup> | # |
|---|-----------------|-----------------|----------------|------------------|----------------|------------------|------|-----------------|-----------------|-----------------|------------------|----------------|------------------|---|
| 1 | <b>213.1234</b> | 107.0653        | 196.0968       | 98.5520          |                |                  | K    |                 |                 |                 |                  |                |                  | 8 |
| 2 | <b>284.1605</b> | 142.5839        | 267.1339       | 134.0706         |                |                  | A    | <b>787.4672</b> | 394.2373        | <b>770.4407</b> | 385.7240         | 769.4567       | 385.2320         | 7 |
| 3 | <b>383.2289</b> | 192.1181        | 366.2023       | 183.6048         |                |                  | V    | <b>716.4301</b> | 358.7187        | 699.4036        | 350.2054         | 698.4196       | 349.7134         | 6 |
| 4 | 484.2766        | 242.6419        | 467.2500       | 234.1287         | 466.2660       | 233.6366         | T    | <b>617.3617</b> | 309.1845        | <b>600.3352</b> | 300.6712         | 599.3511       | 300.1792         | 5 |
| 5 | 654.3821        | 327.6947        | 637.3556       | 319.1814         | 636.3715       | 318.6894         | K    | <b>516.3140</b> | 258.6607        | 499.2875        | 250.1474         |                |                  | 4 |
| 6 | <b>725.4192</b> | 363.2132        | 708.3927       | 354.7000         | 707.4087       | 354.2080         | A    | <b>346.2085</b> | 173.6079        | 329.1819        | 165.0946         |                |                  | 3 |
| 7 | <b>853.4778</b> | 427.2425        | 836.4512       | 418.7293         | 835.4672       | 418.2373         | Q    | <b>275.1714</b> | 138.0893        | 258.1448        | 129.5761         |                |                  | 2 |
| 8 |                 |                 |                |                  |                |                  | K    | <b>147.1128</b> | 74.0600         | 130.0863        | 65.5468          |                |                  | 1 |



**H2BK34****Kaac**ESYSVYVYK**Human HepG2 cells**MS/MS Fragmentation of **KESYSVYVYK**Found in **O60814**, Histone H2B type 1-K OS=Homo sapiens OX=9606 GN=HIST1H2BK PE=1 SV=3

Match to Query 10687: 1348.652648 from(675.333600,2+)

Title: File:20201204\_C12\_HepG2\_ingel\_3\_1.mzXML Scans:16947 RT:75.9022min Charge:2+ Fragmentation:cid

Data file 20201204\_C12\_HepG2\_ingel\_3\_1.rmgf

Click mouse within plot area to zoom in by factor of two about that point

Or: Plot from  to  Da Label all possible matches  Label matches used for scoring 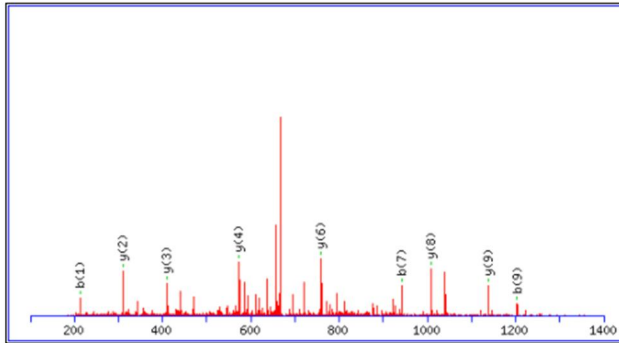Monoisotopic mass of neutral peptide  $M_r(\text{calc})$ : 1348.6551

Variable modifications:

K1 : Acetoacetyl (K)

Ions Score: 48 Expect: 0.00033

Matches : 9/96 fragment ions using 12 most intense peaks ([help](#))

| #  | b                | b <sup>++</sup> | b <sup>*</sup> | b <sup>***</sup> | b <sup>0</sup> | b <sup>0++</sup> | Seq. | y                | y <sup>++</sup> | y <sup>*</sup> | y <sup>***</sup> | y <sup>0</sup> | y <sup>0++</sup> | #  |
|----|------------------|-----------------|----------------|------------------|----------------|------------------|------|------------------|-----------------|----------------|------------------|----------------|------------------|----|
| 1  | <b>213.1234</b>  | 107.0653        | 196.0968       | 98.5520          |                |                  | K    |                  |                 |                |                  |                |                  | 10 |
| 2  | 342.1660         | 171.5866        | 325.1394       | 163.0733         | 324.1554       | 162.5813         | E    | <b>1137.5463</b> | 569.2768        | 1120.5197      | 560.7635         | 1119.5357      | 560.2715         | 9  |
| 3  | 429.1980         | 215.1026        | 412.1714       | 206.5894         | 411.1874       | 206.0973         | S    | <b>1008.5037</b> | 504.7555        | 991.4771       | 496.2422         | 990.4931       | 495.7502         | 8  |
| 4  | 592.2613         | 296.6343        | 575.2348       | 288.1210         | 574.2508       | 287.6290         | Y    | 921.4716         | 461.2395        | 904.4451       | 452.7262         | 903.4611       | 452.2342         | 7  |
| 5  | 679.2933         | 340.1503        | 662.2668       | 331.6370         | 661.2828       | 331.1450         | S    | <b>758.4083</b>  | 379.7078        | 741.3818       | 371.1945         | 740.3978       | 370.7025         | 6  |
| 6  | 778.3618         | 389.6845        | 761.3352       | 381.1712         | 760.3512       | 380.6792         | V    | 671.3763         | 336.1918        | 654.3497       | 327.6785         |                |                  | 5  |
| 7  | <b>941.4251</b>  | 471.2162        | 924.3985       | 462.7029         | 923.4145       | 462.2109         | Y    | <b>572.3079</b>  | 286.6576        | 555.2813       | 278.1443         |                |                  | 4  |
| 8  | 1040.4935        | 520.7504        | 1023.4670      | 512.2371         | 1022.4829      | 511.7451         | V    | <b>409.2445</b>  | 205.1259        | 392.2180       | 196.6126         |                |                  | 3  |
| 9  | <b>1203.5568</b> | 602.2821        | 1186.5303      | 593.7688         | 1185.5463      | 593.2768         | Y    | <b>310.1761</b>  | 155.5917        | 293.1496       | 147.0784         |                |                  | 2  |
| 10 |                  |                 |                |                  |                |                  | K    | 147.1128         | 74.0600         | 130.0863       | 65.5468          |                |                  | 1  |

**H2BK46****VLKacacQVHPDTGISSK****Human HepG2 cells**MS/MS Fragmentation of **VLKQVHPDTGISSK**Found in **O60814**, Histone H2B type 1-K OS=Homo sapiens OX=9606 GN=HIST1H2BK PE=1 SV=3

Match to Query 14322: 1591.854248 from(796.934400,2+)

Title: File:20201204\_C12\_HepG2\_ingel\_3\_1.mzXML Scans:14058 RT:64.9465min Charge:2+ Fragmentation:cid

Data file 20201204\_C12\_HepG2\_ingel\_3\_1.mgf

Click mouse within plot area to zoom in by factor of two about that point

Or, Plot from  to  Da Label all possible matches  Label matches used for scoring 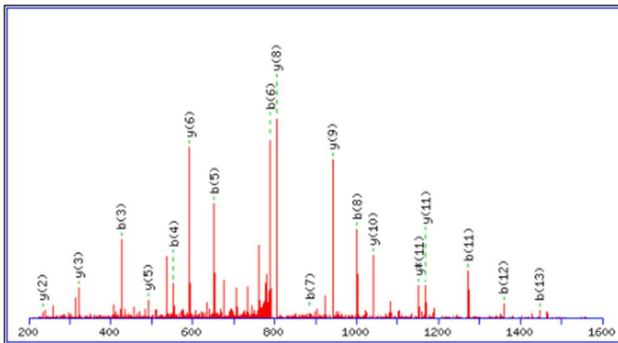Monoisotopic mass of neutral peptide  $M_r(\text{calc})$ : 1591.8570

Variable modifications:

K3 : Acetoacetyl (K)

Ions Score: 49 Expect: 0.00026

Matches : 18/136 fragment ions using 42 most intense peaks ([help](#))

| #  | b                | b <sup>++</sup> | b <sup>*</sup> | b <sup>+++</sup> | b <sup>0</sup> | b <sup>0++</sup> | Seq. | y                | y <sup>++</sup> | y <sup>*</sup>   | y <sup>+++</sup> | y <sup>0</sup> | y <sup>0++</sup> | #  |
|----|------------------|-----------------|----------------|------------------|----------------|------------------|------|------------------|-----------------|------------------|------------------|----------------|------------------|----|
| 1  | 100.0757         | 50.5415         |                |                  |                |                  | V    |                  |                 |                  |                  |                |                  | 14 |
| 2  | 213.1598         | 107.0835        |                |                  |                |                  | L    | 1493.7958        | 747.4016        | 1476.7693        | 738.8883         | 1475.7853      | 738.3963         | 13 |
| 3  | <b>425.2758</b>  | 213.1416        | 408.2493       | 204.6283         |                |                  | K    | 1380.7118        | 690.8595        | 1363.6852        | 682.3462         | 1362.7012      | 681.8542         | 12 |
| 4  | <b>553.3344</b>  | 277.1709        | 536.3079       | 268.6576         |                |                  | Q    | <b>1168.5957</b> | 584.8015        | <b>1151.5691</b> | 576.2882         | 1150.5851      | 575.7962         | 11 |
| 5  | <b>652.4028</b>  | 326.7051        | 635.3763       | 318.1918         |                |                  | V    | <b>1040.5371</b> | 520.7722        | 1023.5106        | 512.2589         | 1022.5265      | 511.7669         | 10 |
| 6  | <b>789.4617</b>  | 395.2345        | 772.4352       | 386.7212         |                |                  | H    | <b>941.4687</b>  | 471.2380        | 924.4421         | 462.7247         | 923.4581       | 462.2327         | 9  |
| 7  | <b>886.5145</b>  | 443.7609        | 869.4880       | 435.2476         |                |                  | P    | <b>804.4098</b>  | 402.7085        | 787.3832         | 394.1953         | 786.3992       | 393.7032         | 8  |
| 8  | <b>1001.5415</b> | 501.2744        | 984.5149       | 492.7611         | 983.5309       | 492.2691         | D    | 707.3570         | 354.1821        | 690.3305         | 345.6689         | 689.3464       | 345.1769         | 7  |
| 9  | 1102.5891        | 551.7982        | 1085.5626      | 543.2849         | 1084.5786      | 542.7929         | T    | <b>592.3301</b>  | 296.6687        | 575.3035         | 288.1554         | 574.3195       | 287.6634         | 6  |
| 10 | 1159.6106        | 580.3089        | 1142.5841      | 571.7957         | 1141.6000      | 571.3037         | G    | <b>491.2824</b>  | 246.1448        | 474.2558         | 237.6316         | 473.2718       | 237.1395         | 5  |
| 11 | <b>1272.6947</b> | 636.8510        | 1255.6681      | 628.3377         | 1254.6841      | 627.8457         | I    | 434.2609         | 217.6341        | 417.2344         | 209.1208         | 416.2504       | 208.6288         | 4  |
| 12 | <b>1359.7267</b> | 680.3670        | 1342.7001      | 671.8537         | 1341.7161      | 671.3617         | S    | <b>321.1769</b>  | 161.0921        | 304.1503         | 152.5788         | 303.1663       | 152.0868         | 3  |
| 13 | <b>1446.7587</b> | 723.8830        | 1429.7322      | 715.3697         | 1428.7482      | 714.8777         | S    | <b>234.1448</b>  | 117.5761        | 217.1183         | 109.0628         | 216.1343       | 108.5708         | 2  |
| 14 |                  |                 |                |                  |                |                  | K    | 147.1128         | 74.0600         | 130.0863         | 65.5468          |                |                  | 1  |

**H2BK86****LAHYSKacacR****Human HepG2 cells**MS/MS Fragmentation of **LAHYSKR**Found in **Q96A08**, Histone H2B type 1-A OS=Homo sapiens OX=9606 GN=HIST1H2BA PE=1 SV=3

Match to Query 627: 957.502048 from(479.758300,2+)

Title: File:20210213\_HepG2\_Kaa\_C12.mzXML Scans:1520 RT:16.9090min Charge:2+ Fragmentation:cid

Data file 20210213\_HepG2\_Kaa\_C12.mgf

Click mouse within plot area to zoom in by factor of two about that point

Or, Plot from  to  Da Label all possible matches:  Label matches used for scoring 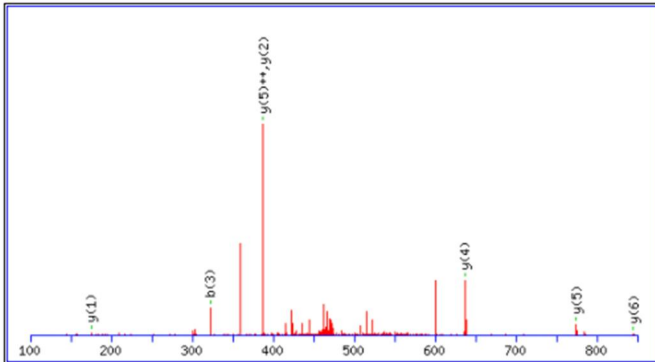Monoisotopic mass of neutral peptide  $M_r(\text{calc})$ : 957.5032

## Variable modifications:

K6 : Acetoacetyl (K)

Ions Score: 37 Expect: 0.031

Matches : 7/50 fragment ions using 8 most intense peaks ([help](#))

| # | b               | b <sup>++</sup> | b <sup>+</sup> | b <sup>+++</sup> | b <sup>0</sup> | b <sup>0++</sup> | Seq. | y               | y <sup>++</sup> | y <sup>+</sup> | y <sup>+++</sup> | y <sup>0</sup> | y <sup>0++</sup> | # |
|---|-----------------|-----------------|----------------|------------------|----------------|------------------|------|-----------------|-----------------|----------------|------------------|----------------|------------------|---|
| 1 | 114.0913        | 57.5493         |                |                  |                |                  | L    |                 |                 |                |                  |                |                  | 7 |
| 2 | 185.1285        | 93.0679         |                |                  |                |                  | A    | <b>845.4264</b> | 423.2169        | 828.3999       | 414.7036         | 827.4159       | 414.2116         | 6 |
| 3 | <b>322.1874</b> | 161.5973        |                |                  |                |                  | H    | <b>774.3893</b> | <b>387.6983</b> | 757.3628       | 379.1850         | 756.3787       | 378.6930         | 5 |
| 4 | 485.2507        | 243.1290        |                |                  |                |                  | Y    | <b>637.3304</b> | 319.1688        | 620.3039       | 310.6556         | 619.3198       | 310.1636         | 4 |
| 5 | 572.2827        | 286.6450        |                |                  | 554.2722       | 277.6397         | S    | 474.2671        | 237.6372        | 457.2405       | 229.1239         | 456.2565       | 228.6319         | 3 |
| 6 | 784.3988        | 392.7030        | 767.3723       | 384.1898         | 766.3882       | 383.6978         | K    | <b>387.2350</b> | 194.1212        | 370.2085       | 185.6079         |                |                  | 2 |
| 7 |                 |                 |                |                  |                |                  | R    | <b>175.1190</b> | 88.0631         | 158.0924       | 79.5498          |                |                  | 1 |

**H2BK116****HAVSEGT**Kacac**AVTKacacYTSSKpr****Rat liver**MS/MS Fragmentation of **HAVSEGTAVTKYTSSK**Found in **MOR4L7**, Histone H2B OS=Rattus norvegicus OX=10116 GN=Hist1h2bl PE=3 SV=1

Match to Query 11836: 2017.023248 from(1009.518900,2+)

Title: File:20201016\_gel\_2\_global.mzXML Scans:12812 RT:72.3862min Charge:2+ Fragmentation:cid

Data file 20201016\_gel\_2\_global.mgf

Click mouse within plot area to zoom in by factor of two about that point

Or, Plot from  to  Da Label all possible matches  Label matches used for scoring 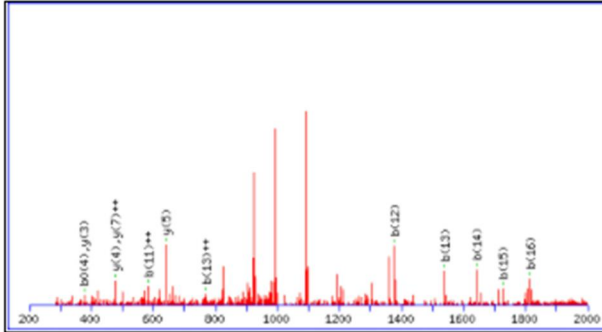

Molecular mass of neutral peptide Mr(calc): 2017.0004

Variable modifications:

K1 : Acetyl (K)

K12 : Acetyl (K)

K17 : Propionyl (K)

K17 : Propionyl (K)

Ions Score: 28 Expect: 0.04

Matches: 127/170 fragment ions using 18 most intense peaks [\(help\)](#)

| #  | b         | b <sup>++</sup> | b <sup>*</sup> | b <sup>+++</sup> | b <sup>0</sup> | b <sup>0++</sup> | Seq | y         | y <sup>++</sup> | y <sup>*</sup> | y <sup>+++</sup> | y <sup>0</sup> | y <sup>0++</sup> | #  |
|----|-----------|-----------------|----------------|------------------|----------------|------------------|-----|-----------|-----------------|----------------|------------------|----------------|------------------|----|
| 1  | 138.0662  | 69.5367         |                |                  |                |                  | H   |           |                 |                |                  |                |                  | 17 |
| 2  | 209.1033  | 105.0553        |                |                  |                |                  | A   | 1880.9488 | 940.9780        | 1863.9222      | 932.4647         | 1862.9382      | 931.9727         | 16 |
| 3  | 308.1717  | 154.5895        |                |                  |                |                  | V   | 1809.9117 | 905.4595        | 1792.8851      | 896.9462         | 1791.9011      | 896.4542         | 15 |
| 4  | 395.2037  | 198.1055        |                |                  | 377.1932       | 189.1002         | S   | 1710.8432 | 855.9253        | 1693.8167      | 847.4120         | 1692.8327      | 846.9200         | 14 |
| 5  | 524.2463  | 262.6268        |                |                  | 506.2358       | 253.6215         | E   | 1623.8112 | 812.4092        | 1606.7847      | 803.8960         | 1605.8006      | 803.4040         | 13 |
| 6  | 581.2678  | 291.1375        |                |                  | 563.2572       | 282.1323         | G   | 1494.7686 | 747.8879        | 1477.7421      | 739.3747         | 1476.7581      | 738.8827         | 12 |
| 7  | 682.3155  | 341.6614        |                |                  | 664.3049       | 332.6561         | T   | 1437.7472 | 719.3772        | 1420.7206      | 710.8639         | 1419.7366      | 710.3719         | 11 |
| 8  | 894.4316  | 447.7194        | 877.4050       | 439.2061         | 876.4210       | 438.7141         | K   | 1336.6995 | 668.8534        | 1319.6729      | 660.3401         | 1318.6889      | 659.8481         | 10 |
| 9  | 965.4687  | 483.2380        | 948.4421       | 474.7247         | 947.4581       | 474.2327         | A   | 1124.5834 | 562.7953        | 1107.5568      | 554.2821         | 1106.5728      | 553.7900         | 9  |
| 10 | 1064.5371 | 532.7722        | 1047.5106      | 524.2589         | 1046.5265      | 523.7669         | V   | 1053.5463 | 527.2768        | 1036.5197      | 518.7635         | 1035.5357      | 518.2715         | 8  |
| 11 | 1165.5848 | 583.2960        | 1148.5582      | 574.7828         | 1147.5742      | 574.2907         | T   | 954.4779  | 477.7426        | 937.4513       | 469.2293         | 936.4673       | 468.7373         | 7  |
| 12 | 1377.7009 | 689.3541        | 1360.6743      | 680.8408         | 1359.6903      | 680.3488         | K   | 853.4302  | 427.2187        | 836.4036       | 418.7055         | 835.4196       | 418.2134         | 6  |
| 13 | 1540.7642 | 770.8857        | 1523.7377      | 762.3725         | 1522.7536      | 761.8805         | Y   | 641.3141  | 321.1607        | 624.2875       | 312.6474         | 623.3035       | 312.1554         | 5  |
| 14 | 1641.8119 | 821.4096        | 1624.7853      | 812.8963         | 1623.8013      | 812.4043         | T   | 478.2508  | 239.6290        | 461.2242       | 231.1157         | 460.2402       | 230.6237         | 4  |
| 15 | 1728.8439 | 864.9256        | 1711.8174      | 856.4123         | 1710.8333      | 855.9203         | S   | 377.2031  | 189.1052        | 360.1765       | 180.5919         | 359.1925       | 180.0999         | 3  |
| 16 | 1815.8759 | 908.4416        | 1798.8494      | 899.9283         | 1797.8654      | 899.4363         | S   | 290.1710  | 145.5892        | 273.1445       | 137.0759         | 272.1605       | 136.5839         | 2  |
| 17 |           |                 |                |                  |                |                  | K   | 203.1390  | 102.0731        | 186.1125       | 93.5599          |                |                  | 1  |

**H2BK120****HAVSEGTKacacAVTKacacYTSSKpr****Rat liver**MS/MS Fragmentation of **HAVSEGTKAVTKYTSSK**Found in **MOR4L7**, Histone H2B OS=Rattus norvegicus OX=10116 GN=Hist1h2bl PE=3 SV=1

Match to Query 11836: 2017.023248 from(1009518900,2+)

Title: File:20201016\_gel\_2\_global.mzXML Scans:12812 RT:7.23862min Charge:2+ Fragmentation:cid

Data file 20201016\_gel\_2\_global.mgf

Click mouse within plot area to zoom in by factor of two about that point

Or, Plot from  to  Da Label all possible matches  Label matches used for scoring 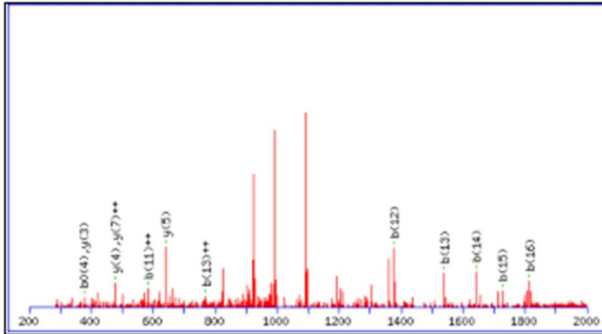

Molecular mass of neutral peptide Mr(calc): 2017.0004

Variable modifications:

K18 : Acetyl (K)

K12 : Acetyl (K)

K17 : Propionyl (K)

K17 : Propionyl (K)

Ions Score: 28 Expect: 0.04

Matches: 127/170 fragment ions using 18 most intense peaks [\(help\)](#)

| #  | b         | b <sup>++</sup> | b <sup>*</sup> | b <sup>+++</sup> | b <sup>0</sup> | b <sup>0++</sup> | Seq | y         | y <sup>++</sup> | y <sup>*</sup> | y <sup>+++</sup> | y <sup>0</sup> | y <sup>0++</sup> | #  |
|----|-----------|-----------------|----------------|------------------|----------------|------------------|-----|-----------|-----------------|----------------|------------------|----------------|------------------|----|
| 1  | 138.0662  | 69.5367         |                |                  |                |                  | H   |           |                 |                |                  |                |                  | 17 |
| 2  | 209.1033  | 105.0553        |                |                  |                |                  | A   | 1880.9488 | 940.9780        | 1863.9222      | 932.4647         | 1862.9382      | 931.9727         | 16 |
| 3  | 308.1717  | 154.5895        |                |                  |                |                  | V   | 1809.9117 | 905.4595        | 1792.8851      | 896.9462         | 1791.9011      | 896.4542         | 15 |
| 4  | 395.2037  | 198.1055        |                |                  | 377.1932       | 189.1002         | S   | 1710.8432 | 855.9253        | 1693.8167      | 847.4120         | 1692.8327      | 846.9200         | 14 |
| 5  | 524.2463  | 262.6268        |                |                  | 506.2358       | 253.6215         | E   | 1623.8112 | 812.4092        | 1606.7847      | 803.8960         | 1605.8006      | 803.4040         | 13 |
| 6  | 581.2678  | 291.1375        |                |                  | 563.2572       | 282.1323         | G   | 1494.7686 | 747.8879        | 1477.7421      | 739.3747         | 1476.7581      | 738.8827         | 12 |
| 7  | 682.3155  | 341.6614        |                |                  | 664.3049       | 332.6561         | T   | 1437.7472 | 719.3772        | 1420.7206      | 710.8639         | 1419.7366      | 710.3719         | 11 |
| 8  | 894.4316  | 447.7194        | 877.4050       | 439.2061         | 876.4210       | 438.7141         | K   | 1336.6995 | 668.8534        | 1319.6729      | 660.3401         | 1318.6889      | 659.8481         | 10 |
| 9  | 965.4687  | 483.2380        | 948.4421       | 474.7247         | 947.4581       | 474.2327         | A   | 1124.5834 | 562.7953        | 1107.5568      | 554.2821         | 1106.5728      | 553.7900         | 9  |
| 10 | 1064.5371 | 532.7722        | 1047.5106      | 524.2589         | 1046.5265      | 523.7669         | V   | 1053.5463 | 527.2768        | 1036.5197      | 518.7635         | 1035.5357      | 518.2715         | 8  |
| 11 | 1165.5848 | 583.2960        | 1148.5582      | 574.7828         | 1147.5742      | 574.2907         | T   | 954.4779  | 477.7426        | 937.4513       | 469.2293         | 936.4673       | 468.7373         | 7  |
| 12 | 1377.7009 | 689.3541        | 1360.6743      | 680.8408         | 1359.6903      | 680.3488         | K   | 853.4302  | 427.2187        | 836.4036       | 418.7055         | 835.4196       | 418.2134         | 6  |
| 13 | 1540.7642 | 770.8857        | 1523.7377      | 762.3725         | 1522.7536      | 761.8805         | Y   | 641.3141  | 321.1607        | 624.2875       | 312.6474         | 623.3035       | 312.1554         | 5  |
| 14 | 1641.8119 | 821.4096        | 1624.7853      | 812.8963         | 1623.8013      | 812.4043         | T   | 478.2508  | 239.6290        | 461.2242       | 231.1157         | 460.2402       | 230.6237         | 4  |
| 15 | 1728.8439 | 864.9256        | 1711.8174      | 856.4123         | 1710.8333      | 855.9203         | S   | 377.2031  | 189.1052        | 360.1765       | 180.5919         | 359.1925       | 180.0999         | 3  |
| 16 | 1815.8759 | 908.4416        | 1798.8494      | 899.9283         | 1797.8654      | 899.4363         | S   | 290.1710  | 145.5892        | 273.1445       | 137.0759         | 272.1605       | 136.5839         | 2  |
| 17 |           |                 |                |                  |                |                  | K   | 203.1390  | 102.0731        | 186.1125       | 93.5599          |                |                  | 1  |



**H3K9****KacacSTGGKprAPR****Human HepG2 cells****MS/MS Fragmentation of KSTGGKAPR**Found in **Q71DI3**, Histone H3.2 OS=Homo sapiens OX=9606 GN=HIST2H3A PE=1 SV=3

Match to Query 4270: 1040.554448 from(521.284500,2+)

Title: File:20201204\_C12\_HepG2\_ingel\_1\_1.mzXML Scans:6956 RT:41.6342min Charge:2+ Fragmentation:cid

Data file 20201204\_C12\_HepG2\_ingel\_1\_1.mgf

Click mouse within plot area to zoom in by factor of two about that point

Or, Plot from  to  Da Label all possible matches  Label matches used for scoring 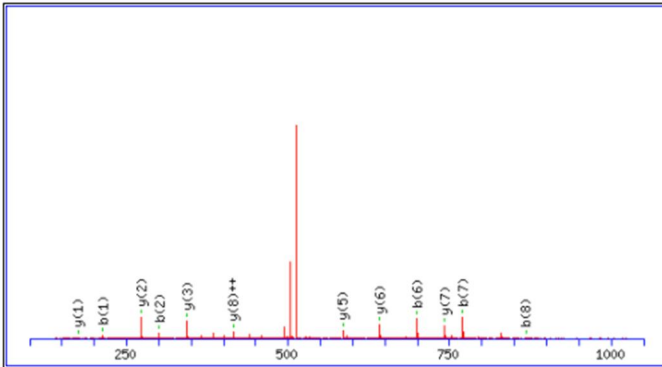**Monoisotopic mass of neutral peptide Mr(calc):** 1040.5614**Variable modifications:****K1** : Acetoacetyl (K)**K6** : Propionyl (K)**Ions Score:** 51 **Expect:** 0.003**Matches** : 12/82 fragment ions using 18 most intense peaks ([help](#))

| # | b               | b <sup>++</sup> | b <sup>*</sup> | b <sup>+++</sup> | b <sup>0</sup> | b <sup>0++</sup> | Seq.     | y               | y <sup>++</sup> | y <sup>*</sup> | y <sup>+++</sup> | y <sup>0</sup> | y <sup>0++</sup> | # |
|---|-----------------|-----------------|----------------|------------------|----------------|------------------|----------|-----------------|-----------------|----------------|------------------|----------------|------------------|---|
| 1 | <b>213.1234</b> | 107.0653        | 196.0968       | 98.5520          |                |                  | <b>K</b> |                 |                 |                |                  |                |                  | 9 |
| 2 | <b>300.1554</b> | 150.5813        | 283.1288       | 142.0681         | 282.1448       | 141.5761         | <b>S</b> | 829.4526        | <b>415.2300</b> | 812.4261       | 406.7167         | 811.4421       | 406.2247         | 8 |
| 3 | 401.2031        | 201.1052        | 384.1765       | 192.5919         | 383.1925       | 192.0999         | <b>T</b> | <b>742.4206</b> | 371.7139        | 725.3941       | 363.2007         | 724.4100       | 362.7087         | 7 |
| 4 | 458.2245        | 229.6159        | 441.1980       | 221.1026         | 440.2140       | 220.6106         | <b>G</b> | <b>641.3729</b> | 321.1901        | 624.3464       | 312.6768         |                |                  | 6 |
| 5 | 515.2460        | 258.1266        | 498.2195       | 249.6134         | 497.2354       | 249.1214         | <b>G</b> | <b>584.3515</b> | 292.6794        | 567.3249       | 284.1661         |                |                  | 5 |
| 6 | <b>699.3672</b> | 350.1872        | 682.3406       | 341.6740         | 681.3566       | 341.1819         | <b>K</b> | 527.3300        | 264.1686        | 510.3035       | 255.6554         |                |                  | 4 |
| 7 | <b>770.4043</b> | 385.7058        | 753.3777       | 377.1925         | 752.3937       | 376.7005         | <b>A</b> | <b>343.2088</b> | 172.1081        | 326.1823       | 163.5948         |                |                  | 3 |
| 8 | <b>867.4571</b> | 434.2322        | 850.4305       | 425.7189         | 849.4465       | 425.2269         | <b>P</b> | <b>272.1717</b> | 136.5895        | 255.1452       | 128.0762         |                |                  | 2 |
| 9 |                 |                 |                |                  |                |                  | <b>R</b> | <b>175.1190</b> | 88.0631         | 158.0924       | 79.5498          |                |                  | 1 |

**H3K14****KmeSTGGKacacAPR****Human HepG2 cells**MS/MS Fragmentation of **KSTGGKAPR**Found in **Q71DI3**, Histone H3.2 OS=Homo sapiens OX=9606 GN=HIST2H3A PE=1 SV=3

Match to Query 4481: 998.538648 from(500.276600,2+)

Title: File:20201204\_C12\_HepG2\_ingel\_3\_2.mzXML Scans:5821 RT:33.6292min Charge:2+ Fragmentation:cid

Data file 20201204\_C12\_HepG2\_ingel\_3\_2.mgf

Click mouse within plot area to zoom in by factor of two about that point

Or, Plot from  to  Da Label all possible matches  Label matches used for scoring 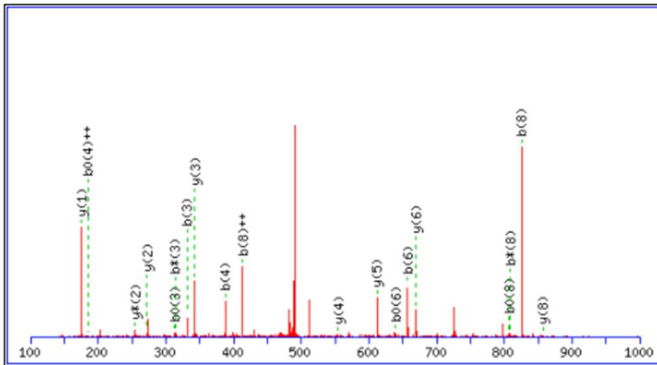Monoisotopic mass of neutral peptide  $M_r(\text{calc})$ : 998.5509

## Variable modifications:

K1 : Methyl (KR)

K6 : Acetoacetyl (K)

Ions Score: 33 Expect: 0.13

Matches : 19/82 fragment ions using 57 most intense peaks ([help](#))

| # | b        | b <sup>++</sup> | b <sup>+</sup> | b <sup>+++</sup> | b <sup>0</sup> | b <sup>0++</sup> | Seq. | y        | y <sup>++</sup> | y <sup>+</sup> | y <sup>+++</sup> | y <sup>0</sup> | y <sup>0++</sup> | # |
|---|----------|-----------------|----------------|------------------|----------------|------------------|------|----------|-----------------|----------------|------------------|----------------|------------------|---|
| 1 | 143.1179 | 72.0626         | 126.0913       | 63.5493          |                |                  | K    |          |                 |                |                  |                |                  | 9 |
| 2 | 230.1499 | 115.5786        | 213.1234       | 107.0653         | 212.1394       | 106.5733         | S    | 857.4476 | 429.2274        | 840.4210       | 420.7141         | 839.4370       | 420.2221         | 8 |
| 3 | 331.1976 | 166.1024        | 314.1710       | 157.5892         | 313.1870       | 157.0972         | T    | 770.4155 | 385.7114        | 753.3890       | 377.1981         | 752.4050       | 376.7061         | 7 |
| 4 | 388.2191 | 194.6132        | 371.1925       | 186.0999         | 370.2085       | 185.6079         | G    | 669.3679 | 335.1876        | 652.3413       | 326.6743         |                |                  | 6 |
| 5 | 445.2405 | 223.1239        | 428.2140       | 214.6106         | 427.2300       | 214.1186         | G    | 612.3464 | 306.6768        | 595.3198       | 298.1636         |                |                  | 5 |
| 6 | 657.3566 | 329.1819        | 640.3301       | 320.6687         | 639.3461       | 320.1767         | K    | 555.3249 | 278.1661        | 538.2984       | 269.6528         |                |                  | 4 |
| 7 | 728.3937 | 364.7005        | 711.3672       | 356.1872         | 710.3832       | 355.6952         | A    | 343.2088 | 172.1081        | 326.1823       | 163.5948         |                |                  | 3 |
| 8 | 825.4465 | 413.2269        | 808.4199       | 404.7136         | 807.4359       | 404.2216         | P    | 272.1717 | 136.5895        | 255.1452       | 128.0762         |                |                  | 2 |
| 9 |          |                 |                |                  |                |                  | R    | 175.1190 | 88.0631         | 158.0924       | 79.5498          |                |                  | 1 |



**H3K18****KacacQLATKprAAR****Human HepG2 cells****MS/MS Fragmentation of KQLATKAAR**Found in **Q71D13**, Histone H3.2 OS=Homo sapiens OX=9606 GN=HIST2H3A PE=1 SV=3

Match to Query 5435: 1125.648848 from(563.831700,2+)

Title: File:20201204\_C12\_HepG2\_ingel\_1\_1.mzXML Scans:13639 RT:65.6817min Charge:2+ Fragmentation:cid

Data file 20201204\_C12\_HepG2\_ingel\_1\_1.mgf

Click mouse within plot area to zoom in by factor of two about that point

Or, Plot from  to  Da Label all possible matches  Label matches used for scoring 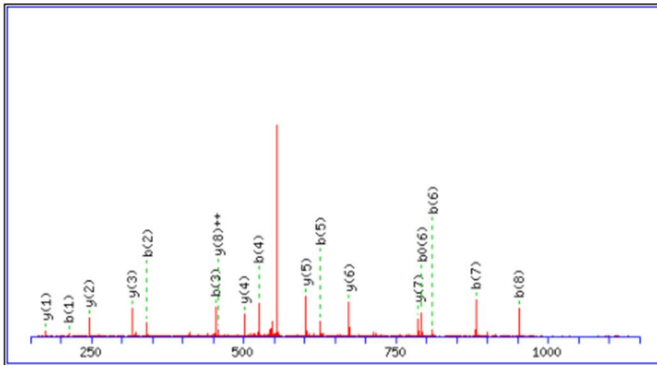Monoisotopic mass of neutral peptide  $M_r(\text{calc})$ : 1125.6506**Variable modifications:**

K1 : Acetoacetyl (K)

K6 : Propionyl (K)

Ions Score: 57 Expect: 0.00028

Matches : 17/80 fragment ions using 30 most intense peaks ([help](#))

| # | b               | b <sup>++</sup> | b <sup>*</sup> | b <sup>+++</sup> | b <sup>0</sup>  | b <sup>0++</sup> | Seq. | y               | y <sup>++</sup> | y <sup>*</sup> | y <sup>+++</sup> | y <sup>0</sup> | y <sup>0++</sup> | # |
|---|-----------------|-----------------|----------------|------------------|-----------------|------------------|------|-----------------|-----------------|----------------|------------------|----------------|------------------|---|
| 1 | <b>213.1234</b> | 107.0653        | 196.0968       | 98.5520          |                 |                  | K    |                 |                 |                |                  |                |                  | 9 |
| 2 | <b>341.1819</b> | 171.0946        | 324.1554       | 162.5813         |                 |                  | Q    | 914.5418        | <b>457.7745</b> | 897.5152       | 449.2613         | 896.5312       | 448.7693         | 8 |
| 3 | <b>454.2660</b> | 227.6366        | 437.2395       | 219.1234         |                 |                  | L    | <b>786.4832</b> | 393.7452        | 769.4567       | 385.2320         | 768.4727       | 384.7400         | 7 |
| 4 | <b>525.3031</b> | 263.1552        | 508.2766       | 254.6419         |                 |                  | A    | <b>673.3992</b> | 337.2032        | 656.3726       | 328.6899         | 655.3886       | 328.1979         | 6 |
| 5 | <b>626.3508</b> | 313.6790        | 609.3243       | 305.1658         | 608.3402        | 304.6738         | T    | <b>602.3620</b> | 301.6847        | 585.3355       | 293.1714         | 584.3515       | 292.6794         | 5 |
| 6 | <b>810.4720</b> | 405.7396        | 793.4454       | 397.2264         | <b>792.4614</b> | 396.7343         | K    | <b>501.3144</b> | 251.1608        | 484.2878       | 242.6475         |                |                  | 4 |
| 7 | <b>881.5091</b> | 441.2582        | 864.4825       | 432.7449         | 863.4985        | 432.2529         | A    | <b>317.1932</b> | 159.1002        | 300.1666       | 150.5870         |                |                  | 3 |
| 8 | <b>952.5462</b> | 476.7767        | 935.5197       | 468.2635         | 934.5356        | 467.7715         | A    | <b>246.1561</b> | 123.5817        | 229.1295       | 115.0684         |                |                  | 2 |
| 9 |                 |                 |                |                  |                 |                  | R    | <b>175.1190</b> | 88.0631         | 158.0924       | 79.5498          |                |                  | 1 |

**H3K23****KprQLATKacacAARme****Human HepG2 cells**MS/MS Fragmentation of **KQLATKAAR**Found in **Q71DI3**, Histone H3.2 OS=Homo sapiens OX=9606 GN=HIST2H3A PE=1 SV=3

Match to Query 5618: 1139.659248 from(570.836900,2+)

Title: File:20201204\_C12\_HepG2\_ingel\_1\_1.mzXML Scans:9252 RT:49.9000min Charge:2+ Fragmentation:cid

Data file 20201204\_C12\_HepG2\_ingel\_1\_1.mngf

Click mouse within plot area to zoom in by factor of two about that point

Or, Plot from  to  Da Label all possible matches  Label matches used for scoring 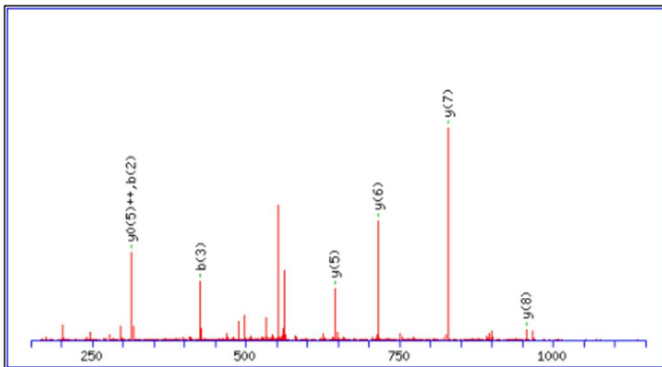Monoisotopic mass of neutral peptide  $M_r(\text{calc})$ : 1139.6662

Variable modifications:

K1 : Propionyl (K)

K6 : Acetoacetyl (K)

R9 : Methyl (RR)

Ions Score: 27 Expect: 0.45

Matches : 7/80 fragment ions using 10 most intense peaks ([help](#))

| # | b               | b <sup>++</sup> | b <sup>*</sup> | b <sup>+++</sup> | b <sup>0</sup> | b <sup>0++</sup> | Seq. | y               | y <sup>++</sup> | y <sup>*</sup> | y <sup>+++</sup> | y <sup>0</sup> | y <sup>0++</sup> | # |
|---|-----------------|-----------------|----------------|------------------|----------------|------------------|------|-----------------|-----------------|----------------|------------------|----------------|------------------|---|
| 1 | 185.1285        | 93.0679         | 168.1019       | 84.5546          |                |                  | K    |                 |                 |                |                  |                |                  | 9 |
| 2 | <b>313.1870</b> | 157.0972        | 296.1605       | 148.5839         |                |                  | Q    | <b>956.5524</b> | 478.7798        | 939.5258       | 470.2665         | 938.5418       | 469.7745         | 8 |
| 3 | <b>426.2711</b> | 213.6392        | 409.2445       | 205.1259         |                |                  | L    | <b>828.4938</b> | 414.7505        | 811.4672       | 406.2373         | 810.4832       | 405.7452         | 7 |
| 4 | 497.3082        | 249.1577        | 480.2817       | 240.6445         |                |                  | A    | <b>715.4097</b> | 358.2085        | 698.3832       | 349.6952         | 697.3992       | 349.2032         | 6 |
| 5 | 598.3559        | 299.6816        | 581.3293       | 291.1683         | 580.3453       | 290.6763         | T    | <b>644.3726</b> | 322.6899        | 627.3461       | 314.1767         | 626.3620       | <b>313.6847</b>  | 5 |
| 6 | 810.4720        | 405.7396        | 793.4454       | 397.2264         | 792.4614       | 396.7343         | K    | 543.3249        | 272.1661        | 526.2984       | 263.6528         |                |                  | 4 |
| 7 | 881.5091        | 441.2582        | 864.4825       | 432.7449         | 863.4985       | 432.2529         | A    | 331.2088        | 166.1081        | 314.1823       | 157.5948         |                |                  | 3 |
| 8 | 952.5462        | 476.7767        | 935.5197       | 468.2635         | 934.5356       | 467.7715         | A    | 260.1717        | 130.5895        | 243.1452       | 122.0762         |                |                  | 2 |
| 9 |                 |                 |                |                  |                |                  | R    | 189.1346        | 95.0709         | 172.1081       | 86.5577          |                |                  | 1 |

H3K27

KacacSAPATGGVKprKprPHR

Human HepG2 cells

MS/MS Fragmentation of **K**SAPATGGV**K**KPHR

Found in **Q71DI3**, Histone H3.2 OS=Homo sapiens OX=9606 GN=HIST2H3A PE=1 SV=3

Match to Query 12563: 1628.893048 from(815.453800,2+)

Title: File:20201204\_C12\_HepG2\_ingel\_1\_1.mzXML Scans:10383 RT:54.0352min Charge:2+ Fragmentation:cid

Data file 20201204\_C12\_HepG2\_ingel\_1\_1.mgf

Click mouse within plot area to zoom in by factor of two about that point

Or, Plot from 200 to 1700 Da Full range

Label all possible matches Label matches used for scoring

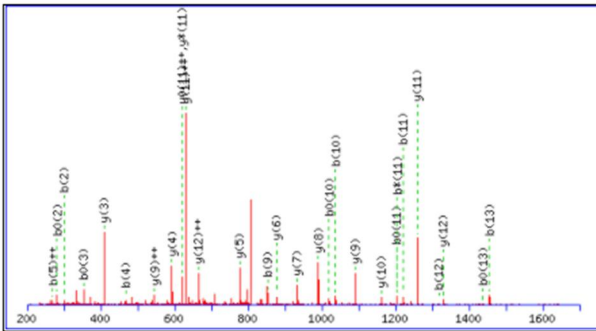

Monoisotopic mass of neutral peptide M<sub>r</sub>(calc): 1628.8935

Variable modifications:

K1 : Acetylated (K)

K10 : Propionyl (K)

K11 : Propionyl (K)

Ions Score: 56 Expect: 0.0013

Matches : 29/158 fragment ions using 57 most intense peaks (help)

| #  | b                | b <sup>++</sup> | b <sup>*</sup>   | b <sup>++</sup> | b <sup>0</sup>   | b <sup>0++</sup> | Seq | y                | y <sup>++</sup> | y <sup>*</sup> | y <sup>++</sup> | y <sup>0</sup> | y <sup>0++</sup> | #  |
|----|------------------|-----------------|------------------|-----------------|------------------|------------------|-----|------------------|-----------------|----------------|-----------------|----------------|------------------|----|
| 1  | 213.1234         | 107.0653        | 196.0968         | 98.5520         |                  |                  | K   |                  |                 |                |                 |                |                  | 14 |
| 2  | <b>300.1554</b>  | 150.5813        | 283.1288         | 142.0681        | <b>282.1448</b>  | 141.5761         | S   | 1417.7910        | 709.3992        | 1400.7645      | 700.8859        | 1399.7805      | 700.3939         | 13 |
| 3  | 371.1925         | 186.0999        | 354.1660         | 177.5866        | <b>353.1819</b>  | 177.0946         | A   | <b>1330.7590</b> | <b>665.8831</b> | 1313.7324      | 657.3699        | 1312.7484      | 656.8779         | 12 |
| 4  | <b>468.2453</b>  | 234.6263        | 451.2187         | 226.1130        | 450.2347         | 225.6210         | P   | <b>1259.7219</b> | <b>630.3646</b> | 1242.6953      | <b>621.8513</b> | 1241.7113      | <b>621.3593</b>  | 11 |
| 5  | 539.2824         | <b>270.1448</b> | 522.2558         | 261.6316        | 521.2718         | 261.1395         | A   | <b>1162.6691</b> | 581.8382        | 1145.6426      | 573.3249        | 1144.6586      | 572.8329         | 10 |
| 6  | 640.3301         | 320.6687        | 623.3035         | 312.1554        | 622.3195         | 311.6634         | T   | <b>1091.6320</b> | <b>546.3196</b> | 1074.6055      | 537.8064        | 1073.6214      | 537.3144         | 9  |
| 7  | 697.3515         | 349.1794        | 680.3250         | 340.6661        | 679.3410         | 340.1741         | G   | <b>990.5843</b>  | 495.7958        | 973.5578       | 487.2825        |                |                  | 8  |
| 8  | 754.3730         | 377.6901        | 737.3464         | 369.1769        | 736.3624         | 368.6849         | G   | <b>933.5629</b>  | 467.2851        | 916.5363       | 458.7718        |                |                  | 7  |
| 9  | <b>853.4414</b>  | 427.2243        | 836.4149         | 418.7111        | 835.4308         | 418.2191         | V   | <b>876.5414</b>  | 438.7743        | 859.5148       | 430.2611        |                |                  | 6  |
| 10 | <b>1037.5626</b> | 519.2849        | 1020.5360        | 510.7717        | <b>1019.5520</b> | 510.2796         | K   | <b>777.4730</b>  | 389.2401        | 760.4464       | 380.7269        |                |                  | 5  |
| 11 | <b>1221.6838</b> | 611.3455        | <b>1204.6572</b> | 602.8322        | <b>1203.6732</b> | 602.3402         | K   | <b>593.3518</b>  | 297.1795        | 576.3253       | 288.6663        |                |                  | 4  |
| 12 | <b>1318.7365</b> | 659.8719        | 1301.7100        | 651.3586        | 1300.7260        | 650.8666         | P   | <b>409.2306</b>  | 205.1190        | 392.2041       | 196.6057        |                |                  | 3  |
| 13 | <b>1455.7954</b> | 728.4014        | 1438.7689        | 719.8881        | <b>1437.7849</b> | 719.3961         | H   | 312.1779         | 156.5926        | 295.1513       | 148.0793        |                |                  | 2  |
| 14 |                  |                 |                  |                 |                  |                  | R   | 175.1190         | 88.0631         | 158.0924       | 79.5498         |                |                  | 1  |

H3K36

KacacSAPATGGV**Kacac**KacPHR

Human MCF-7cell

MS/MS Fragmentation of KSAPATGGVKKPHR  
Found in Q71DI3, Histone H3.2  
Match to Query 13110: 1624.988172 from(542.670000,3+)

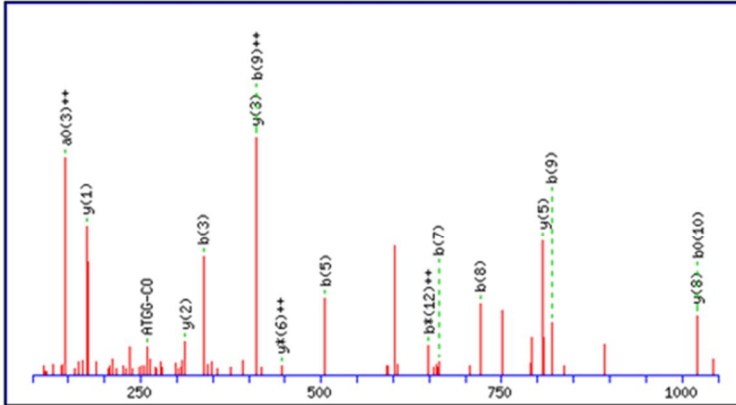

Monoisotopic mass of neutral peptide Mr(calc): 1624.98

Variable modifications:

K1 : Trimethyl (K8)

K10 : Acetoacetyl (K8)

K11 : Trimethyl (K8)

Ions Score: 49 Expect: 0.022

Matches (Bold Red): 16/319 fragment ions using 20 most intense peaks

| #  | Inmon. | a       | a <sup>++</sup> | a <sup>+</sup> | a <sup>+++</sup> | a <sup>0</sup> | a <sup>0++</sup> | b             | b <sup>++</sup> | b <sup>+</sup> | b <sup>+++</sup> | b <sup>0</sup> | b <sup>0++</sup> | Seq. | y              | y <sup>++</sup> | y <sup>+</sup> | y <sup>+++</sup> | y <sup>0</sup> | y <sup>0++</sup> | # |    |
|----|--------|---------|-----------------|----------------|------------------|----------------|------------------|---------------|-----------------|----------------|------------------|----------------|------------------|------|----------------|-----------------|----------------|------------------|----------------|------------------|---|----|
| 1  | 151.17 | 151.17  | 76.09           | 134.14         | 67.57            |                |                  | 179.16        | 90.09           | 162.14         | 81.57            |                |                  | K    |                |                 |                |                  |                |                  |   | 14 |
| 2  | 60.04  | 238.20  | 119.60          | 221.17         | 111.09           | 220.19         | 110.60           | 266.20        | 133.60          | 249.17         | 125.09           | 248.18         | 124.60           | S    | 1447.84        | 724.42          | 1430.81        | 715.91           | 1429.82        | 715.42           |   | 13 |
| 3  | 44.05  | 309.24  | 155.12          | 292.21         | 146.61           | 291.23         | <b>146.12</b>    | <b>337.23</b> | 169.12          | 320.21         | 160.61           | 319.22         | 160.11           | A    | 1360.80        | 680.91          | 1343.78        | 672.39           | 1342.79        | 671.90           |   | 12 |
| 4  | 70.07  | 406.29  | 203.65          | 389.26         | 195.14           | 388.28         | 194.64           | 434.29        | 217.65          | 417.26         | 209.13           | 416.27         | 208.64           | P    | 1289.77        | 645.39          | 1272.74        | 636.87           | 1271.76        | 636.38           |   | 11 |
| 5  | 44.05  | 477.33  | 239.17          | 460.30         | 230.65           | 459.32         | 230.16           | <b>505.32</b> | 253.16          | 488.30         | 244.65           | 487.31         | 244.16           | A    | 1192.71        | 596.86          | 1175.69        | 588.35           | 1174.70        | 587.85           |   | 10 |
| 6  | 74.06  | 578.38  | 289.69          | 561.35         | 281.18           | 560.36         | 280.69           | 606.37        | 303.69          | 589.34         | 295.18           | 588.36         | 294.68           | T    | 1121.68        | 561.34          | 1104.65        | 552.83           | 1103.67        | 552.34           |   | 9  |
| 7  | 30.03  | 635.40  | 318.20          | 618.37         | 309.69           | 617.39         | 309.20           | <b>663.39</b> | 332.20          | 646.36         | 323.69           | 645.38         | 323.19           | G    | <b>1020.63</b> | 510.82          | 1003.60        | 502.30           |                |                  |   | 8  |
| 8  | 30.03  | 692.42  | 346.71          | 675.39         | 338.20           | 674.41         | 337.71           | <b>720.41</b> | 360.71          | 703.39         | 352.20           | 702.40         | 351.70           | G    | 963.61         | 482.31          | 946.58         | 473.79           |                |                  |   | 7  |
| 9  | 72.08  | 791.49  | 396.25          | 774.46         | 387.73           | 773.48         | 387.24           | <b>819.48</b> | <b>410.24</b>   | 802.45         | 401.73           | 801.47         | 401.24           | V    | 906.59         | 453.80          | 889.56         | <b>445.28</b>    |                |                  |   | 6  |
| 10 | 193.14 | 1011.62 | 506.31          | 994.59         | 497.80           | 993.61         | 497.31           | 1039.61       | 520.31          | 1022.59        | 511.80           | <b>1021.60</b> | 511.30           | K    | <b>807.52</b>  | 404.26          | 790.49         | 395.75           |                |                  |   | 5  |
| 11 | 151.17 | 1189.77 | 595.39          | 1172.75        | 586.88           | 1171.76        | 586.38           | 1217.77       | 609.39          | 1200.74        | 600.87           | 1199.76        | 600.38           | K    | 587.39         | 294.20          | 570.36         | 285.68           |                |                  |   | 4  |
| 12 | 70.07  | 1286.83 | 643.92          | 1269.80        | 635.40           | 1268.82        | 634.91           | 1314.82       | 657.91          | 1297.79        | <b>649.40</b>    | 1296.81        | 648.91           | P    | <b>409.23</b>  | 205.12          | 392.20         | 196.61           |                |                  |   | 3  |
| 13 | 110.07 | 1423.88 | 712.45          | 1406.86        | 703.93           | 1405.87        | 703.44           | 1451.88       | 726.44          | 1434.85        | 717.93           | 1433.87        | 717.44           | H    | <b>312.18</b>  | 156.59          | 295.15         | 148.08           |                |                  |   | 2  |
| 14 | 129.11 |         |                 |                |                  |                |                  |               |                 |                |                  |                |                  | R    | <b>175.12</b>  | 88.06           | 158.09         | 79.55            |                |                  |   | 1  |

H3K37

KacacSAPATGGVKacKacacPHR

Human HepG2 cells

MS/MS Fragmentation of **KSPATGGVKKPHR**

Found in **Q71D13**, Histone H3.2 OS=Homo sapiens OX=9606 GN=HIST2H3A PE=1 SV=3

Match to Query 12271: 1642.910648 from(822.462600,2+)

Title: File:20201204\_C12\_HepG2\_ingel\_1\_2.mzXML Scans:11664 RT:58.1875min Charge:2+ Fragmentation:cid

Data file 20201204\_C12\_HepG2\_ingel\_1\_2.mgf

Click mouse within plot area to zoom in by factor of two about that point

Or, Plot from 200 to 1700 Da Full range

Label all possible matches  Label matches used for scoring

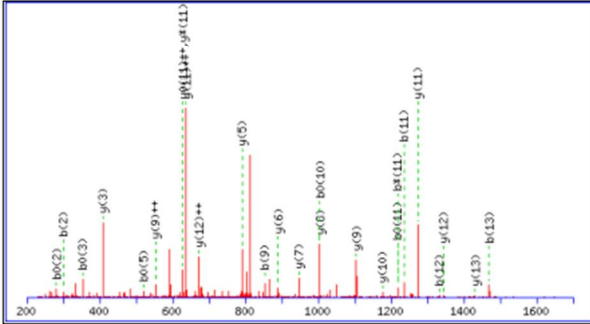

Monoisotopic mass of neutral peptide M<sub>r</sub>(calc): 1642.8791

Variable modifications:

K1 : Acetoacetyl (K)

K10 : Acetyl (K)

K11 : Acetoacetyl (K)

Ions Score: 72 Expect: 1.6e-006

Matches : 26/155 fragment ions using 41 most intense peaks [\(help\)](#)

| #  | b                | b <sup>++</sup> | b <sup>*</sup>   | b <sup>+++</sup> | b <sup>0</sup>   | b <sup>0++</sup> | Seq | y                | y <sup>++</sup> | y <sup>*</sup> | y <sup>+++</sup> | y <sup>0</sup> | y <sup>0++</sup> | #  |
|----|------------------|-----------------|------------------|------------------|------------------|------------------|-----|------------------|-----------------|----------------|------------------|----------------|------------------|----|
| 1  | 213.1234         | 107.0653        | 196.0968         | 98.5520          |                  |                  | K   |                  |                 |                |                  |                |                  | 14 |
| 2  | <b>300.1554</b>  | 150.5813        | 283.1288         | 142.0681         | <b>282.1448</b>  | 141.5761         | S   | <b>1431.7703</b> | 716.3888        | 1414.7437      | 707.8755         | 1413.7597      | 707.3835         | 13 |
| 3  | 371.1925         | 186.0999        | 354.1660         | 177.5866         | <b>353.1819</b>  | 177.0946         | A   | <b>1344.7383</b> | <b>672.8728</b> | 1327.7117      | 664.3595         | 1326.7277      | 663.8675         | 12 |
| 4  | 468.2453         | 234.6263        | 451.2187         | 226.1130         | 450.2347         | 225.6210         | P   | <b>1273.7011</b> | <b>637.3542</b> | 1256.6746      | <b>628.8409</b>  | 1255.6906      | <b>628.3489</b>  | 11 |
| 5  | 539.2824         | 270.1448        | 522.2558         | 261.6316         | <b>521.2718</b>  | 261.1395         | A   | <b>1176.6484</b> | 588.8278        | 1159.6218      | 580.3146         | 1158.6378      | 579.8225         | 10 |
| 6  | 640.3301         | 320.6687        | 623.3035         | 312.1554         | 622.3195         | 311.6634         | T   | <b>1105.6113</b> | <b>553.3093</b> | 1088.5847      | 544.7960         | 1087.6007      | 544.3040         | 9  |
| 7  | 697.3515         | 349.1794        | 680.3250         | 340.6661         | 679.3410         | 340.1741         | G   | <b>1004.5636</b> | 502.7854        | 987.5370       | 494.2722         |                |                  | 8  |
| 8  | 754.3730         | 377.6901        | 737.3464         | 369.1769         | 736.3624         | 368.6849         | G   | <b>947.5421</b>  | 474.2747        | 930.5156       | 465.7614         |                |                  | 7  |
| 9  | <b>853.4414</b>  | 427.2243        | 836.4149         | 418.7111         | 835.4308         | 418.2191         | V   | <b>890.5207</b>  | 445.7640        | 873.4941       | 437.2507         |                |                  | 6  |
| 10 | 1023.5469        | 512.2771        | 1006.5204        | 503.7638         | <b>1005.5364</b> | 503.2718         | K   | <b>791.4522</b>  | 396.2298        | 774.4257       | 387.7165         |                |                  | 5  |
| 11 | <b>1235.6630</b> | 618.3352        | <b>1218.6365</b> | 609.8219         | <b>1217.6525</b> | 609.3299         | K   | 621.3467         | 311.1770        | 604.3202       | 302.6637         |                |                  | 4  |
| 12 | <b>1332.7158</b> | 666.8615        | 1315.6892        | 658.3483         | 1314.7052        | 657.8563         | P   | <b>409.2306</b>  | 205.1190        | 392.2041       | 196.6057         |                |                  | 3  |
| 13 | <b>1469.7747</b> | 735.3910        | 1452.7482        | 726.8777         | 1451.7641        | 726.3857         | H   | 312.1779         | 156.5926        | 295.1513       | 148.0793         |                |                  | 2  |
| 14 |                  |                 |                  |                  |                  |                  | R   | 175.1190         | 88.0631         | 158.0924       | 79.5498          |                |                  | 1  |



**H3K56****RmeYQKacacSTELLIR****Human HepG2 cells**MS/MS Fragmentation of **RYQKSTELLIR**Found in **Q71DI3**, Histone H3.2 OS=Homo sapiens OX=9606 GN=HIST2H3A PE=1 SV=3

Match to Query 10875: 1503.831448 from(752.923000,2+)

Title: File:20201204\_C12\_HepG2\_ingel\_1\_1.mzXML Scans:14283 RT:67.9427min Charge:2+ Fragmentation:cid

Data file 20201204\_C12\_HepG2\_ingel\_1\_1.mgf

Click mouse within plot area to zoom in by factor of two about that point

Or, Plot from  to  Da Label all possible matches  Label matches used for scoring 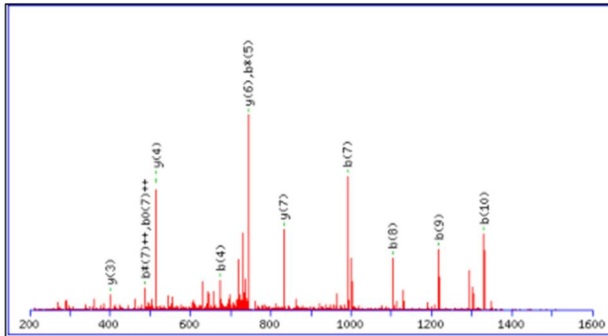

Monoisotopic mass of neutral peptide Mr(oxio): 1503.8408

Variable modifications:

R1 : Methyl (KR)

K4 : Acetoacetyl (K)

Ions Score: 34 Expect: 0.058

Matches : 12/104 fragment ions using 15 most intense peaks ([help](#))

| #  | b                | b <sup>++</sup> | b <sup>*</sup>  | b <sup>++</sup> | b <sup>0</sup> | b <sup>0++</sup> | Seq | y               | y <sup>++</sup> | y <sup>*</sup> | y <sup>++</sup> | y <sup>0</sup> | y <sup>0++</sup> | #  |
|----|------------------|-----------------|-----------------|-----------------|----------------|------------------|-----|-----------------|-----------------|----------------|-----------------|----------------|------------------|----|
| 1  | 171.1240         | 86.0657         | 154.0975        | 77.5524         |                |                  | R   |                 |                 |                |                 |                |                  | 11 |
| 2  | 334.1874         | 167.5973        | 317.1608        | 159.0840        |                |                  | Y   | 1334.7314       | 667.8694        | 1317.7049      | 659.3561        | 1316.7209      | 658.8641         | 10 |
| 3  | 462.2459         | 231.6266        | 445.2194        | 223.1133        |                |                  | Q   | 1171.6681       | 586.3377        | 1154.6416      | 577.8244        | 1153.6575      | 577.3324         | 9  |
| 4  | <b>674.3620</b>  | 337.6847        | 657.3355        | 329.1714        |                |                  | K   | 1043.6095       | 522.3084        | 1026.5830      | 513.7951        | 1025.5990      | 513.3031         | 8  |
| 5  | 761.3941         | 381.2007        | <b>744.3675</b> | 372.6874        | 743.3835       | 372.1954         | S   | <b>831.4934</b> | 416.2504        | 814.4669       | 407.7371        | 813.4829       | 407.2451         | 7  |
| 6  | 862.4417         | 431.7245        | 845.4152        | 423.2112        | 844.4312       | 422.7192         | T   | <b>744.4614</b> | 372.7343        | 727.4349       | 364.2211        | 726.4509       | 363.7291         | 6  |
| 7  | <b>991.4843</b>  | 496.2458        | 974.4578        | <b>487.7325</b> | 973.4738       | <b>487.2405</b>  | E   | 643.4137        | 322.2105        | 626.3872       | 313.6972        | 625.4032       | 313.2052         | 5  |
| 8  | <b>1104.5684</b> | 552.7878        | 1087.5419       | 544.2746        | 1086.5578      | 543.7826         | L   | <b>514.3711</b> | 257.6892        | 497.3446       | 249.1759        |                |                  | 4  |
| 9  | <b>1217.6525</b> | 609.3299        | 1200.6259       | 600.8166        | 1199.6419      | 600.3246         | L   | <b>401.2871</b> | 201.1472        | 384.2605       | 192.6339        |                |                  | 3  |
| 10 | <b>1330.7365</b> | 665.8719        | 1313.7100       | 657.3586        | 1312.7260      | 656.8666         | I   | 288.2030        | 144.6051        | 271.1765       | 136.0919        |                |                  | 2  |
| 11 |                  |                 |                 |                 |                |                  | R   | 175.1190        | 88.0631         | 158.0924       | 79.5498         |                |                  | 1  |

H3K79

EIAQDF**K**acacTDLR

Human MCF-7 cells

MS/MS Fragmentation of EIAQDFKTDLR

Found in Q71DI3, Histone H3.2

Match to Query 5262: 1418.703318 from(710.358935,2+)

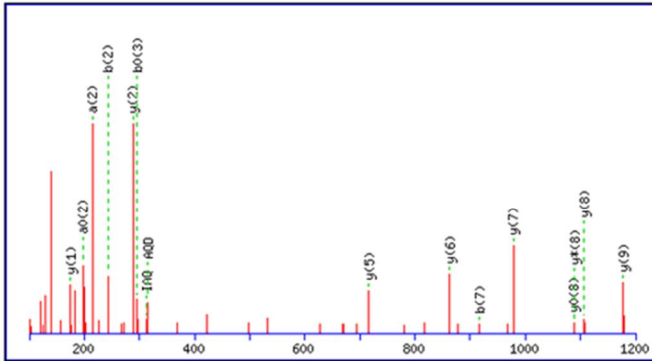

Monoisotopic mass of neutral peptide Mr(calc): 1418.70

Variable modifications:

K7 : Acetoacetyl (K)

Ions Score: 38 Expect: 0.12

Matches (Bold Red): 16/226 fragment ions using 30 most intense peaks

| #  | Immon. | a             | a <sup>++</sup> | a <sup>+</sup> | a <sup>+++</sup> | a <sup>0</sup> | a <sup>0++</sup> | b             | b <sup>++</sup> | b <sup>+</sup> | b <sup>+++</sup> | b <sup>0</sup> | b <sup>0++</sup> | Seq. | y              | y <sup>++</sup> | y <sup>+</sup> | y <sup>+++</sup> | y <sup>0</sup> | y <sup>0++</sup> | #  |
|----|--------|---------------|-----------------|----------------|------------------|----------------|------------------|---------------|-----------------|----------------|------------------|----------------|------------------|------|----------------|-----------------|----------------|------------------|----------------|------------------|----|
| 1  | 102.05 | 102.05        | 51.53           |                |                  | 84.04          | 42.53            | 130.05        | 65.53           |                |                  | 112.04         | 56.52            | F    |                |                 |                |                  |                |                  | 11 |
| 2  | 86.10  | <b>215.14</b> | 108.07          |                |                  | <b>197.13</b>  | 99.07            | <b>243.13</b> | 122.07          |                |                  | 225.12         | 113.07           | I    | 1290.67        | 645.84          | 1273.64        | 637.32           | 1272.66        | 636.83           | 10 |
| 3  | 44.05  | 286.18        | 143.59          |                |                  | 268.17         | 134.59           | 314.17        | 157.59          |                |                  | <b>296.16</b>  | 148.58           | A    | <b>1177.58</b> | 589.30          | 1160.56        | 580.78           | 1159.57        | 580.29           | 9  |
| 4  | 101.07 | 414.23        | 207.62          | 397.21         | 199.11           | 396.22         | 198.62           | 442.23        | 221.62          | 425.20         | 213.11           | 424.22         | 212.61           | Q    | <b>1106.55</b> | 553.78          | <b>1089.52</b> | 545.26           | <b>1088.54</b> | 544.77           | 8  |
| 5  | 88.04  | 529.26        | 265.13          | 512.24         | 256.62           | 511.25         | 256.13           | 557.26        | 279.13          | 540.23         | 270.62           | 539.25         | 270.13           | D    | <b>978.49</b>  | 489.75          | 961.46         | 481.23           | 960.48         | 480.74           | 7  |
| 6  | 120.08 | 676.33        | 338.67          | 659.30         | 330.16           | 658.32         | 329.66           | 704.32        | 352.67          | 687.30         | 344.15           | 686.31         | 343.66           | F    | <b>863.46</b>  | 432.23          | 846.44         | 423.72           | 845.45         | 423.23           | 6  |
| 7  | 185.13 | 888.45        | 444.73          | 871.42         | 436.21           | 870.44         | 435.72           | <b>916.44</b> | 458.72          | 899.41         | 450.21           | 898.43         | 449.72           | K    | <b>716.39</b>  | 358.70          | 699.37         | 350.19           | 698.38         | 349.70           | 5  |
| 8  | 74.06  | 989.49        | 495.25          | 972.47         | 486.74           | 971.48         | 486.25           | 1017.49       | 509.25          | 1000.46        | 500.73           | 999.48         | 500.24           | T    | 504.28         | 252.64          | 487.25         | 244.13           | 486.27         | 243.64           | 4  |
| 9  | 88.04  | 1104.52       | 552.76          | 1087.49        | 544.25           | 1086.51        | 543.76           | 1132.52       | 566.76          | 1115.49        | 558.25           | 1114.51        | 557.76           | D    | 403.23         | 202.12          | 386.20         | 193.61           | 385.22         | 193.11           | 3  |
| 10 | 86.10  | 1217.60       | 609.31          | 1200.58        | 600.79           | 1199.59        | 600.30           | 1245.60       | 623.30          | 1228.57        | 614.79           | 1227.59        | 614.30           | L    | <b>288.20</b>  | 144.61          | 271.18         | 136.09           |                |                  | 2  |
| 11 | 129.11 |               |                 |                |                  |                |                  |               |                 |                |                  |                |                  | R    | <b>175.12</b>  | 88.06           | 158.09         | 79.55            |                |                  | 1  |



**H3K122****RVTIMPKacacDIQLAR****Human HepG2 cells**MS/MS Fragmentation of **RVTIMPKDIQLAR**Found in **Q71DI3**, Histone H3.2 OS=Homo sapiens OX=9606 GN=HIST2H3A PE=1 SV=3

Match to Query 14762: 1623.910448 from(812.962500,2+)

Title: File:20201204\_C12\_HepG2\_ingel\_3\_1.mzXML Scans:18221 RT:80.7747min Charge:2+ Fragmentation:cid

Data file 20201204\_C12\_HepG2\_ingel\_3\_1.mgf

Click mouse within plot area to zoom in by factor of two about that point

Or, Plot from  to  Da Label all possible matches  Label matches used for scoring 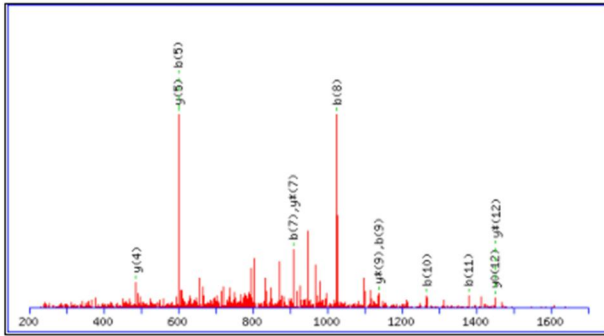

Monoisotopic mass of neutral peptide Mr(oxide): 1623.9150

Variable modifications:

K7 : Acetyloxy (K)

Ions Score: 31 Expect: 0.12

Matches : 13/180 fragment ions using 26 most intense peaks ([help](#))

| #  | b         | b <sup>++</sup> | b <sup>+</sup> | b <sup>+++</sup> | b <sup>0</sup> | b <sup>0++</sup> | Seq | y         | y <sup>++</sup> | y <sup>+</sup> | y <sup>+++</sup> | y <sup>0</sup> | y <sup>0++</sup> | #  |
|----|-----------|-----------------|----------------|------------------|----------------|------------------|-----|-----------|-----------------|----------------|------------------|----------------|------------------|----|
| 1  | 157.1084  | 79.0578         | 140.0818       | 70.5446          |                |                  | R   |           |                 |                |                  |                |                  | 13 |
| 2  | 256.1768  | 128.5920        | 239.1503       | 120.0788         |                |                  | V   | 1468.8192 | 734.9132        | 1451.7927      | 726.4000         | 1450.8086      | 725.9080         | 12 |
| 3  | 357.2245  | 179.1159        | 340.1979       | 170.6026         | 339.2139       | 170.1106         | T   | 1369.7508 | 685.3790        | 1352.7243      | 676.8658         | 1351.7402      | 676.3738         | 11 |
| 4  | 470.3085  | 235.6579        | 453.2820       | 227.1446         | 452.2980       | 226.6526         | I   | 1268.7031 | 634.8552        | 1251.6766      | 626.3419         | 1250.6926      | 625.8499         | 10 |
| 5  | 601.3490  | 301.1782        | 584.3225       | 292.6649         | 583.3385       | 292.1729         | M   | 1155.6191 | 578.3132        | 1138.5925      | 569.7999         | 1137.6085      | 569.3079         | 9  |
| 6  | 698.4018  | 349.7045        | 681.3752       | 341.1913         | 680.3912       | 340.6993         | P   | 1024.5786 | 512.7929        | 1007.5520      | 504.2796         | 1006.5680      | 503.7876         | 8  |
| 7  | 910.5179  | 455.7626        | 893.4913       | 447.2493         | 892.5073       | 446.7573         | K   | 927.5258  | 464.2665        | 910.4993       | 455.7533         | 909.5152       | 455.2613         | 7  |
| 8  | 1025.5448 | 513.2761        | 1008.5183      | 504.7628         | 1007.5343      | 504.2708         | D   | 715.4097  | 358.2085        | 698.3832       | 349.6952         | 697.3991       | 349.2032         | 6  |
| 9  | 1138.6289 | 569.8181        | 1121.6023      | 561.3048         | 1120.6183      | 560.8128         | I   | 600.3828  | 300.6950        | 583.3562       | 292.1817         |                |                  | 5  |
| 10 | 1266.6875 | 633.8474        | 1249.6609      | 625.3341         | 1248.6769      | 624.8421         | Q   | 487.2987  | 244.1530        | 470.2722       | 235.6397         |                |                  | 4  |
| 11 | 1379.7715 | 690.3894        | 1362.7450      | 681.8761         | 1361.7610      | 681.3841         | L   | 359.2401  | 180.1237        | 342.2136       | 171.6104         |                |                  | 3  |
| 12 | 1450.8086 | 725.9080        | 1433.7821      | 717.3947         | 1432.7981      | 716.9027         | A   | 246.1561  | 123.5817        | 229.1295       | 115.0684         |                |                  | 2  |
| 13 |           |                 |                |                  |                |                  | R   | 175.1190  | 88.0631         | 158.0924       | 79.5498          |                |                  | 1  |

**H4K5****GKacacGGKacGLGK****Human HepG2 cells**MS/MS Fragmentation of **GKGGKGLGK**Found in **P62805**, Histone H4 OS=Homo sapiens OX=9606 GN=HIST1H4A PE=1 SV=2

Match to Query 3021: 926.520448 from(464.267500,2+)

Title: File:20201204\_C12\_HepG2\_ingel\_3\_1.mzXML Scans:8570 RT:44.5735min Charge:2+ Fragmentation:cid

Data file 20201204\_C12\_HepG2\_ingel\_3\_1.mgf

Click mouse within plot area to zoom in by factor of two about that point

Or, Plot from  to  Da Label all possible matches  Label matches used for scoring 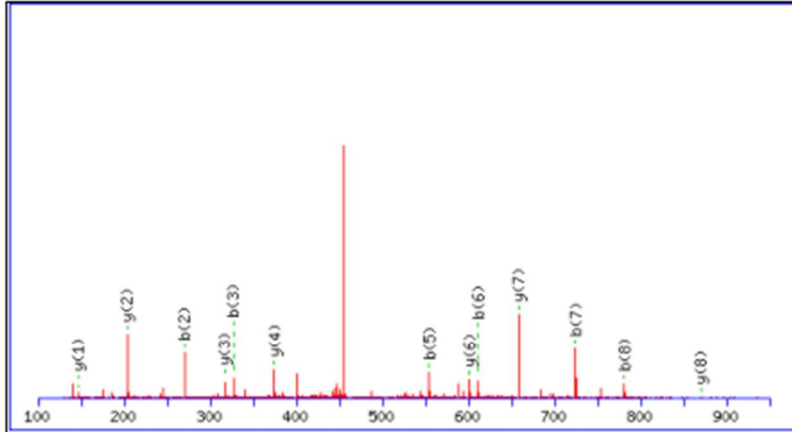Monoisotopic mass of neutral peptide  $M_r(\text{calc})$ : 926.5185

Variable modifications:

K2 : Acetoacetyl (K)

K5 : Acetyl (K)

Ions Score: 47 Expect: 0.004

Matches : 13/82 fragment ions using 32 most intense peaks ([help](#))

| # | b               | b <sup>++</sup> | b*       | b <sup>+++</sup> | Seq | y               | y <sup>++</sup> | y*       | y <sup>+++</sup> | # |
|---|-----------------|-----------------|----------|------------------|-----|-----------------|-----------------|----------|------------------|---|
| 1 | 58.0287         | 29.5180         |          |                  | G   |                 |                 |          |                  | 9 |
| 2 | <b>270.1448</b> | 135.5761        | 253.1183 | 127.0628         | K   | <b>870.5043</b> | 435.7558        | 853.4778 | 427.2425         | 8 |
| 3 | <b>327.1663</b> | 164.0868        | 310.1397 | 155.5735         | G   | <b>658.3883</b> | 329.6978        | 641.3617 | 321.1845         | 7 |
| 4 | 384.1878        | 192.5975        | 367.1612 | 184.0842         | G   | <b>601.3668</b> | 301.1870        | 584.3402 | 292.6738         | 6 |
| 5 | <b>554.2933</b> | 277.6503        | 537.2667 | 269.1370         | K   | 544.3453        | 272.6763        | 527.3188 | 264.1630         | 5 |
| 6 | <b>611.3148</b> | 306.1610        | 594.2882 | 297.6477         | G   | <b>374.2398</b> | 187.6235        | 357.2132 | 179.1103         | 4 |
| 7 | <b>724.3988</b> | 362.7030        | 707.3723 | 354.1898         | L   | <b>317.2183</b> | 159.1128        | 300.1918 | 150.5995         | 3 |
| 8 | <b>781.4203</b> | 391.2138        | 764.3937 | 382.7005         | G   | <b>204.1343</b> | 102.5708        | 187.1077 | 94.0575          | 2 |
| 9 |                 |                 |          |                  | K   | <b>147.1128</b> | 74.0600         | 130.0863 | 65.5468          | 1 |

H4K8

GKprGG**Kacac**GLGKdiGGAKprR

Human MCF-7 cells

MS/MS Fragmentation of GKGGKGLGKGGAKR

Found in P62805, Histone H4

Match to Query 11538: 1517.905448 from(759.960000,2+)

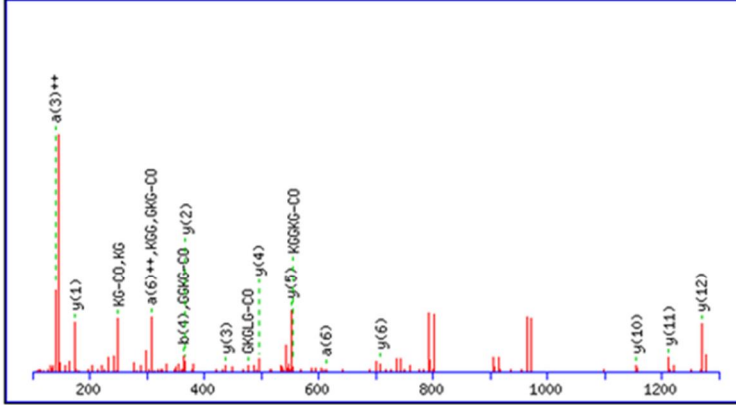

Monoisotopic mass of neutral peptide Mr(calc): 1517.91

Variable modifications:

K2 : Propionyl (K8)

K5 : Acetoacetyl (K8)

K9 : Dimethyl (K8R)

K13 : Propionyl (K8)

Ions Score: 39 Expect: 0.17

Matches (**Bold Red**): 26/262 fragment ions using 46 most intense peaks

| #  | Immon. | a             | a <sup>++</sup> | a <sup>+</sup> | a <sup>+++</sup> | b             | b <sup>++</sup> | b <sup>+</sup> | b <sup>+++</sup> | Seq. | y              | y <sup>++</sup> | y <sup>+</sup> | y <sup>+++</sup> | #  |
|----|--------|---------------|-----------------|----------------|------------------|---------------|-----------------|----------------|------------------|------|----------------|-----------------|----------------|------------------|----|
| 1  | 30.03  | 30.03         | 15.52           |                |                  | 58.03         | 29.52           |                |                  | G    |                |                 |                |                  | 14 |
| 2  | 165.15 | 222.17        | 111.59          | 205.14         | 103.07           | <b>250.16</b> | 125.59          | 233.14         | 117.07           | K    | 1461.90        | 731.45          | 1444.87        | 722.94           | 13 |
| 3  | 30.03  | 279.19        | <b>140.10</b>   | 262.16         | 131.59           | <b>307.19</b> | 154.10          | 290.16         | 145.58           | G    | <b>1269.76</b> | 635.38          | 1252.73        | 626.87           | 12 |
| 4  | 30.03  | 336.21        | 168.61          | 319.19         | 160.10           | <b>364.21</b> | 182.61          | 347.18         | 174.09           | G    | <b>1212.74</b> | 606.87          | 1195.71        | 598.36           | 11 |
| 5  | 193.14 | <b>556.34</b> | 278.67          | 539.32         | 270.16           | 584.34        | 292.67          | 567.31         | 284.16           | K    | <b>1155.72</b> | 578.36          | 1138.69        | 569.85           | 10 |
| 6  | 30.03  | <b>613.36</b> | <b>307.19</b>   | 596.34         | 298.67           | 641.36        | 321.18          | 624.33         | 312.67           | G    | 935.59         | 468.30          | 918.56         | 459.78           | 9  |
| 7  | 86.10  | 726.45        | 363.73          | 709.42         | 355.21           | 754.44        | 377.73          | 737.42         | 369.21           | L    | 878.57         | 439.79          | 861.54         | 431.27           | 8  |
| 8  | 30.03  | 783.47        | 392.24          | 766.44         | 383.73           | 811.46        | 406.24          | 794.44         | 397.72           | G    | 765.48         | 383.24          | 748.46         | 374.73           | 7  |
| 9  | 129.14 | 939.60        | 470.30          | 922.57         | 461.79           | 967.59        | 484.30          | 950.56         | 475.79           | K    | <b>708.46</b>  | 354.73          | 691.43         | 346.22           | 6  |
| 10 | 30.03  | 996.62        | 498.81          | 979.59         | 490.30           | 1024.61       | 512.81          | 1007.59        | 504.30           | G    | <b>552.33</b>  | 276.67          | 535.31         | 268.16           | 5  |
| 11 | 30.03  | 1053.64       | 527.32          | 1036.61        | 518.81           | 1081.63       | 541.32          | 1064.61        | 532.81           | G    | <b>495.31</b>  | 248.16          | 478.29         | 239.65           | 4  |
| 12 | 44.05  | 1124.68       | 562.84          | 1107.65        | 554.33           | 1152.67       | 576.84          | 1135.64        | 568.33           | A    | <b>438.29</b>  | 219.65          | 421.26         | 211.14           | 3  |
| 13 | 165.15 | 1316.81       | 658.91          | 1299.78        | 650.40           | 1344.81       | 672.91          | 1327.78        | 664.39           | K    | <b>367.25</b>  | 184.13          | 350.23         | 175.62           | 2  |
| 14 | 129.11 |               |                 |                |                  |               |                 |                |                  | R    | <b>175.12</b>  | 88.06           | 158.09         | 79.55            | 1  |

**H4K12****GLGKacacGGAKacR****Human HepG2 cells**MS/MS Fragmentation of **GLGKGGAKR**Found in **P62805**, Histone H4 OS=Homo sapiens OX=9606 GN=HIST1H4A PE=1 SV=2

Match to Query 6961: 968.538248 from(485.276400,2+)

Title: File:20201205\_C12\_HepG2\_target\_2.mzXML Scans:7431 RT:48.2668min Charge:2+ Fragmentation:cid

Data file 20201205\_C12\_HepG2\_target\_2.mgf

Click mouse within plot area to zoom in by factor of two about that point

Or   to  Da Label all possible matches  Label matches used for scoring 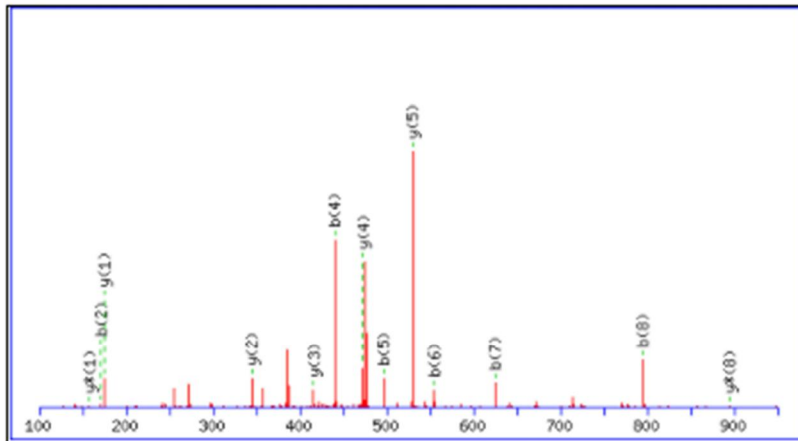Monoisotopic mass of neutral peptide  $M_r(\text{calc})$ : 968.5403

Variable modifications:

K4 : Acetylacetyl (K)

K8 : Acetyl (K)

Ions Score: 28 Expect: 0.13

Matches : 13/53 fragment ions using 48 most intense peaks ([help](#))

| # | b               | b <sup>++</sup> | b <sup>*</sup> | b <sup>+++</sup> | Seq. | y               | y <sup>++</sup> | y <sup>*</sup>  | y <sup>+++</sup> | # |
|---|-----------------|-----------------|----------------|------------------|------|-----------------|-----------------|-----------------|------------------|---|
| 1 | 58.0287         | 29.5180         |                |                  | G    |                 |                 |                 |                  | 9 |
| 2 | <b>171.1128</b> | 86.0600         |                |                  | L    | 912.5261        | 456.7667        | <b>895.4996</b> | 448.2534         | 8 |
| 3 | 228.1343        | 114.5708        |                |                  | G    | 799.4421        | 400.2247        | 782.4155        | 391.7114         | 7 |
| 4 | <b>440.2504</b> | 220.6288        | 423.2238       | 212.1155         | K    | 742.4206        | 371.7139        | 725.3941        | 363.2007         | 6 |
| 5 | <b>497.2718</b> | 249.1395        | 480.2453       | 240.6263         | G    | <b>530.3045</b> | 265.6559        | 513.2780        | 257.1426         | 5 |
| 6 | <b>554.2933</b> | 277.6503        | 537.2667       | 269.1370         | G    | <b>473.2831</b> | 237.1452        | 456.2565        | 228.6319         | 4 |
| 7 | <b>625.3304</b> | 313.1688        | 608.3039       | 304.6556         | A    | <b>416.2616</b> | 208.6344        | 399.2350        | 200.1212         | 3 |
| 8 | <b>795.4359</b> | 398.2216        | 778.4094       | 389.7083         | K    | <b>345.2245</b> | 173.1159        | 328.1979        | 164.6026         | 2 |
| 9 |                 |                 |                |                  | R    | <b>175.1190</b> | 88.0631         | <b>158.0924</b> | 79.5498          | 1 |

H4K20

KacacVLRDNIQGITKprPAIR

Rat liver

MS/MS Fragmentation of **KVLRDNIQGITKPAIR**

Found in **P62804**, Histone H4 OS=Rattus norvegicus OX=10116 GN=Hist1h4b PE=1 SV=2

Match to Query 11928: 1961.172848 from(981.593700,2+)

Title: File:20201016\_gel\_6\_global.mzXML Scans:11564 RT:62.4307min Charge:2+

Fragmentation:cid

Data file 20201016\_gel\_6\_global.mgf

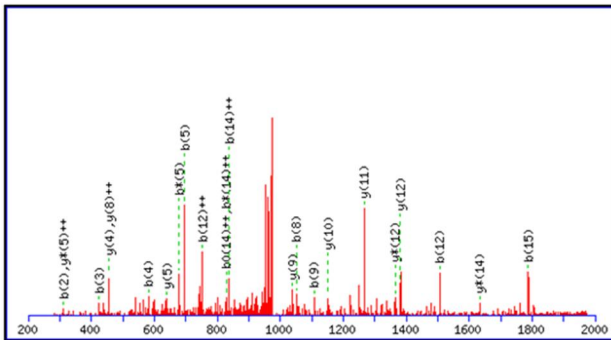

Monoisotopic mass of neutral peptide Mr(calc): 1961.1422

Variable modifications:

K1 : Acetoacetyl (K)

K12 : Propionyl (K)

Ions Score: 53 Expect: 0.00021

Matches : 23/162 fragment ions using 34 most intense peaks

| #  | b                | b <sup>++</sup> | b <sup>+</sup>  | b <sup>+++</sup> | b <sup>0</sup> | b <sup>0++</sup> | Seq. | y                | y <sup>++</sup> | y <sup>+</sup>   | y <sup>+++</sup> | y <sup>0</sup> | y <sup>0++</sup> | #  |
|----|------------------|-----------------|-----------------|------------------|----------------|------------------|------|------------------|-----------------|------------------|------------------|----------------|------------------|----|
| 1  | 213.1234         | 107.0653        | 196.0968        | 98.5520          |                |                  | K    |                  |                 |                  |                  |                |                  | 16 |
| 2  | <b>312.1918</b>  | 156.5995        | 295.1652        | 148.0863         |                |                  | V    | 1750.0334        | 875.5203        | 1733.0068        | 867.0071         | 1732.0228      | 866.5150         | 15 |
| 3  | <b>425.2758</b>  | 213.1416        | 408.2493        | 204.6283         |                |                  | L    | 1650.9650        | 825.9861        | <b>1633.9384</b> | 817.4728         | 1632.9544      | 816.9808         | 14 |
| 4  | <b>581.3770</b>  | 291.1921        | 564.3504        | 282.6788         |                |                  | R    | 1537.8809        | 769.4441        | 1520.8544        | 760.9308         | 1519.8703      | 760.4388         | 13 |
| 5  | <b>696.4039</b>  | 348.7056        | <b>679.3774</b> | 340.1923         | 678.3993       | 339.7003         | D    | <b>1381.7798</b> | 691.3995        | <b>1364.7532</b> | 682.8803         | 1363.7692      | 682.3883         | 12 |
| 6  | 810.4468         | 405.7271        | 793.4203        | 397.2138         | 792.4963       | 396.7218         | N    | <b>1266.7528</b> | 633.8801        | 1249.7263        | 625.3668         | 1248.7423      | 624.8748         | 11 |
| 7  | 923.5309         | 462.2691        | 906.5043        | 453.7558         | 905.5203       | 453.2638         | I    | <b>1152.7098</b> | 576.8586        | 1135.6834        | 568.3453         | 1134.6994      | 567.8533         | 10 |
| 8  | <b>1051.5895</b> | 526.2984        | 1034.5629       | 517.7851         | 1033.5789      | 517.2931         | Q    | <b>1038.6259</b> | 520.3166        | 1022.5993        | 511.8033         | 1021.6153      | 511.3113         | 9  |
| 9  | <b>1108.6109</b> | 554.8091        | 1091.5844       | 546.2958         | 1090.6004      | 545.8038         | G    | 911.5673         | <b>456.2873</b> | 894.5407         | 447.7740         | 893.5567       | 447.2820         | 8  |
| 10 | 1221.6950        | 611.3511        | 1204.6684       | 602.8379         | 1203.6844      | 602.3459         | I    | 854.5458         | 427.7765        | 837.5193         | 419.2633         | 836.5352       | 418.7713         | 7  |
| 11 | 1322.7427        | 661.8750        | 1305.7161       | 653.3617         | 1304.7321      | 652.8697         | T    | 741.4618         | 371.2345        | 724.4352         | 362.7212         | 723.4512       | 362.2292         | 6  |
| 12 | <b>1506.8639</b> | <b>753.9356</b> | 1489.8373       | 745.4223         | 1488.8533      | 744.9303         | K    | <b>640.4141</b>  | 320.7107        | 623.3875         | <b>312.1974</b>  |                |                  | 5  |
| 13 | 1603.9166        | 802.4619        | 1586.8901       | 793.9487         | 1585.9061      | 793.4567         | P    | <b>456.2929</b>  | 228.6501        | 439.2663         | 220.1368         |                |                  | 4  |
| 14 | 1674.9537        | <b>837.9805</b> | 1657.9272       | <b>829.4672</b>  | 1656.9432      | <b>828.9752</b>  | A    | 359.2401         | 180.1237        | 342.2136         | 171.6104         |                |                  | 3  |
| 15 | <b>1788.0378</b> | 894.5225        | 1771.0112       | 886.0093         | 1770.0272      | 885.5173         | I    | 288.2030         | 144.6051        | 271.1765         | 136.0919         |                |                  | 2  |
| 16 |                  |                 |                 |                  |                |                  | R    | 175.1190         | 88.0631         | 158.0924         | 79.5498          |                |                  | 1  |



H4K31

DNIQGIT**K**acacPAIR

Human MCF-7 cell

MS/MS Fragmentation of DNIQGITPAIR  
Found in P62805, Histone H4  
Match to Query 5149: 1408.764696 from(705.389624,2+)

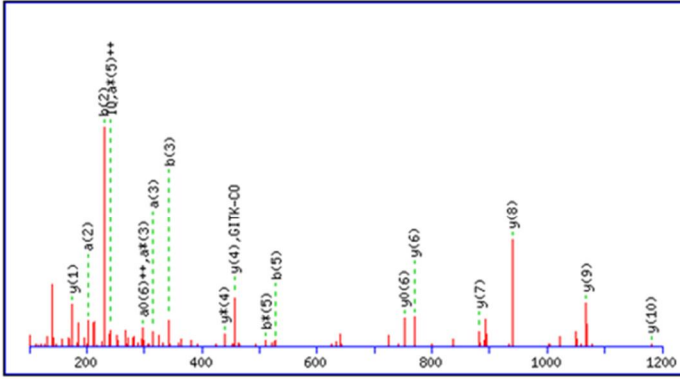

Monoisotopic mass of neutral peptide M<sub>r</sub>(calc): 1408.77

Variable modifications:

K8 : Acetoacetyl (K)

Ions Score: 50 Expect: 0.012

Matches (Bold Red): 20/263 fragment ions using 27 most intense peaks

| #  | Inmon. | a             | a <sup>++</sup> | a <sup>+</sup> | a <sup>+++</sup> | a <sup>0</sup> | a <sup>0++</sup> | b             | b <sup>++</sup> | b <sup>+</sup> | b <sup>+++</sup> | b <sup>0</sup> | b <sup>0++</sup> | Seq. | y              | y <sup>++</sup> | y <sup>+</sup> | y <sup>+++</sup> | y <sup>0</sup> | y <sup>0++</sup> | #  |
|----|--------|---------------|-----------------|----------------|------------------|----------------|------------------|---------------|-----------------|----------------|------------------|----------------|------------------|------|----------------|-----------------|----------------|------------------|----------------|------------------|----|
| 1  | 88.04  | 88.04         | 44.52           |                |                  | 70.03          | 35.52            | 116.03        | 58.52           |                |                  | 98.02          | 49.52            | D    |                |                 |                |                  |                |                  | 12 |
| 2  | 87.06  | <b>202.08</b> | 101.54          | 185.06         | 93.03            | 184.07         | 92.54            | <b>230.08</b> | 115.54          | 213.05         | 107.03           | 212.07         | 106.54           | N    | 1294.75        | 647.88          | 1277.72        | 639.36           | 1276.74        | 638.87           | 11 |
| 3  | 86.10  | <b>315.17</b> | 158.09          | <b>298.14</b>  | 149.57           | 297.16         | 149.08           | <b>343.16</b> | 172.08          | 326.13         | 163.57           | 325.15         | 163.08           | I    | <b>1180.70</b> | 590.86          | 1163.68        | 582.34           | 1162.69        | 581.85           | 10 |
| 4  | 101.07 | 443.22        | 222.12          | 426.20         | 213.60           | 425.21         | 213.11           | 471.22        | 236.11          | 454.19         | 227.60           | 453.21         | 227.11           | Q    | <b>1067.62</b> | 534.31          | 1050.59        | 525.80           | 1049.61        | 525.31           | 9  |
| 5  | 30.03  | 500.25        | 250.63          | 483.22         | <b>242.11</b>    | 482.24         | 241.62           | <b>528.24</b> | 264.62          | <b>511.21</b>  | 256.11           | 510.23         | 255.62           | G    | <b>939.56</b>  | 470.28          | 922.54         | 461.77           | 921.55         | 461.28           | 8  |
| 6  | 86.10  | 613.33        | 307.17          | 596.30         | 298.66           | 595.32         | <b>298.16</b>    | 641.33        | 321.17          | 624.30         | 312.65           | 623.31         | 312.16           | I    | <b>882.54</b>  | 441.77          | 865.51         | 433.26           | 864.53         | 432.77           | 7  |
| 7  | 74.06  | 714.38        | 357.69          | 697.35         | 349.18           | 696.37         | 348.69           | 742.37        | 371.69          | 725.35         | 363.18           | 724.36         | 362.68           | T    | <b>769.46</b>  | 385.23          | 752.43         | 376.72           | <b>751.45</b>  | 376.23           | 6  |
| 8  | 185.13 | 926.49        | 463.75          | 909.47         | 455.24           | 908.48         | 454.75           | 954.49        | 477.75          | 937.46         | 469.23           | 936.48         | 468.74           | K    | 668.41         | 334.71          | 651.38         | 326.19           |                |                  | 5  |
| 9  | 70.07  | 1023.55       | 512.28          | 1006.52        | 503.76           | 1005.54        | 503.27           | 1051.54       | 526.27          | 1034.52        | 517.76           | 1033.53        | 517.27           | P    | <b>456.29</b>  | 228.65          | <b>439.27</b>  | 220.14           |                |                  | 4  |
| 10 | 44.05  | 1094.58       | 547.80          | 1077.56        | 539.28           | 1076.57        | 538.79           | 1122.58       | 561.79          | 1105.55        | 553.28           | 1104.57        | 552.79           | A    | 359.24         | 180.12          | 342.21         | 171.61           |                |                  | 3  |
| 11 | 86.10  | 1207.67       | 604.34          | 1190.64        | 595.82           | 1189.66        | 595.33           | 1235.66       | 618.34          | 1218.64        | 609.82           | 1217.65        | 609.33           | I    | 288.20         | 144.61          | 271.18         | 136.09           |                |                  | 2  |
| 12 | 129.11 |               |                 |                |                  |                |                  |               |                 |                |                  |                |                  | R    | <b>175.12</b>  | 88.06           | 158.09         | 79.55            |                |                  | 1  |

H4K44

GGV**K**acacRdiISGLIYEETR

Human HeLA cells

MS/MS Fragmentation of **GGVKRISGLIYEETR**

Found in **P62805**, Histone H4

Match to Query 9122: 1788.968172 from(597.330000,3+)

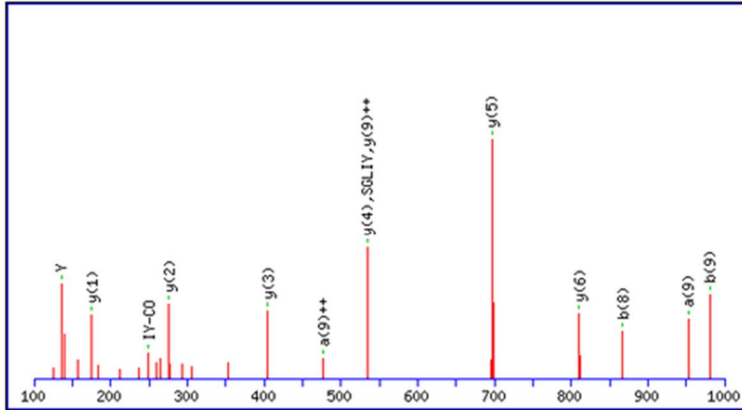

Monoisotopic mass of neutral peptide Mr(calc): 1788.97

Variable modifications:

K4 : Acetoacetyl (K)

R5 : Dimethyl0 (KR)

Ions Score: 38 Expect: 0.52

Matches (Bold Red): 14/320 fragment ions using 17 most intense peaks

| #  | Inmon.        | a             | a <sup>++</sup> | a <sup>+</sup> | a <sup>+++</sup> | a <sup>0</sup> | a <sup>0++</sup> | b             | b <sup>++</sup> | b <sup>+</sup> | b <sup>+++</sup> | b <sup>0</sup> | b <sup>0++</sup> | Seq. | y             | y <sup>++</sup> | y <sup>+</sup> | y <sup>+++</sup> | y <sup>0</sup> | y <sup>0++</sup> | #  |
|----|---------------|---------------|-----------------|----------------|------------------|----------------|------------------|---------------|-----------------|----------------|------------------|----------------|------------------|------|---------------|-----------------|----------------|------------------|----------------|------------------|----|
| 1  | 30.03         | 30.03         | 15.52           |                |                  |                |                  | 58.03         | 29.52           |                |                  |                |                  | G    |               |                 |                |                  |                |                  | 15 |
| 2  | 30.03         | 87.06         | 44.03           |                |                  |                |                  | 115.05        | 58.03           |                |                  |                |                  | G    | 1732.96       | 866.98          | 1715.93        | 858.47           | 1714.95        | 857.98           | 14 |
| 3  | 72.08         | 186.12        | 93.57           |                |                  |                |                  | 214.12        | 107.56          |                |                  |                |                  | V    | 1675.94       | 838.47          | 1658.91        | 829.96           | 1657.93        | 829.47           | 13 |
| 4  | 185.13        | 398.24        | 199.62          | 381.21         | 191.11           |                |                  | 426.23        | 213.62          | 409.21         | 205.11           |                |                  | K    | 1576.87       | 788.94          | 1559.84        | 780.43           | 1558.86        | 779.93           | 12 |
| 5  | 157.14        | 582.37        | 291.69          | 565.35         | 283.18           |                |                  | 610.37        | 305.69          | 593.34         | 297.17           |                |                  | R    | 1364.75       | 682.88          | 1347.73        | 674.37           | 1346.74        | 673.87           | 11 |
| 6  | 86.10         | 695.46        | 348.23          | 678.43         | 339.72           |                |                  | 723.45        | 362.23          | 706.42         | 353.72           |                |                  | I    | 1180.62       | 590.81          | 1163.59        | 582.30           | 1162.61        | 581.81           | 10 |
| 7  | 60.04         | 782.49        | 391.75          | 765.46         | 383.23           | 764.48         | 382.74           | 810.48        | 405.75          | 793.46         | 397.23           | 792.47         | 396.74           | S    | 1067.54       | <b>534.27</b>   | 1050.51        | 525.76           | 1049.53        | 525.27           | 9  |
| 8  | 30.03         | 839.51        | 420.26          | 822.48         | 411.75           | 821.50         | 411.25           | <b>867.50</b> | 434.26          | 850.48         | 425.74           | 849.49         | 425.25           | G    | 980.50        | 490.76          | 963.48         | 482.24           | 962.49         | 481.75           | 8  |
| 9  | 86.10         | <b>952.59</b> | <b>476.80</b>   | 935.57         | 468.29           | 934.58         | 467.80           | <b>980.59</b> | 490.80          | 963.56         | 482.28           | 962.58         | 481.79           | L    | 923.48        | 462.25          | 906.46         | 453.73           | 905.47         | 453.24           | 7  |
| 10 | 86.10         | 1065.68       | 533.34          | 1048.65        | 524.83           | 1047.67        | 524.34           | 1093.67       | 547.34          | 1076.65        | 538.83           | 1075.66        | 538.33           | I    | <b>810.40</b> | 405.70          | 793.37         | 397.19           | 792.39         | 396.70           | 6  |
| 11 | <b>136.08</b> | 1228.74       | 614.87          | 1211.71        | 606.36           | 1210.73        | 605.87           | 1256.74       | 628.87          | 1239.71        | 620.36           | 1238.73        | 619.87           | Y    | <b>697.32</b> | 349.16          | 680.29         | 340.65           | 679.30         | 340.16           | 5  |
| 12 | 102.05        | 1357.78       | 679.40          | 1340.76        | 670.88           | 1339.77        | 670.39           | 1385.78       | 693.39          | 1368.75        | 684.88           | 1367.77        | 684.39           | E    | <b>534.25</b> | 267.63          | 517.23         | 259.12           | 516.24         | 258.62           | 4  |
| 13 | 102.05        | 1486.83       | 743.92          | 1469.80        | 735.40           | 1468.82        | 734.91           | 1514.82       | 757.91          | 1497.79        | 749.40           | 1496.81        | 748.91           | E    | <b>405.21</b> | 203.11          | 388.18         | 194.59           | 387.20         | 194.10           | 3  |
| 14 | 74.06         | 1587.87       | 794.44          | 1570.85        | 785.93           | 1569.86        | 785.44           | 1615.87       | 808.44          | 1598.84        | 799.92           | 1597.86        | 799.43           | T    | <b>276.17</b> | 138.59          | 259.14         | 130.07           | 258.16         | 129.58           | 2  |
| 15 | 129.11        |               |                 |                |                  |                |                  |               |                 |                |                  |                |                  | R    | <b>175.12</b> | 88.06           | 158.09         | 79.55            |                |                  | 1  |



**H4K59****GVLKacacVFLENVIR****Human HepG2 cells**MS/MS Fragmentation of **GVLKFLENVIR**Found in **P62805**, Histone H4 OS=Homo sapiens OX=9606 GN=HIST1H4A PE=1 SV=2

Match to Query 10362: 1469.861048 from(735.937800,2+)

Title: File:20201204\_C12\_HepG2\_ingel\_1\_1.mzXML Scans:28113 RT:116.9038min Charge:2+ Fragmentation:cid

Data file 20201204\_C12\_HepG2\_ingel\_1\_1.mgf

Click mouse within plot area to zoom in by factor of two about that point

Or, Plot from  to  Da Label all possible matches  Label matches used for scoring 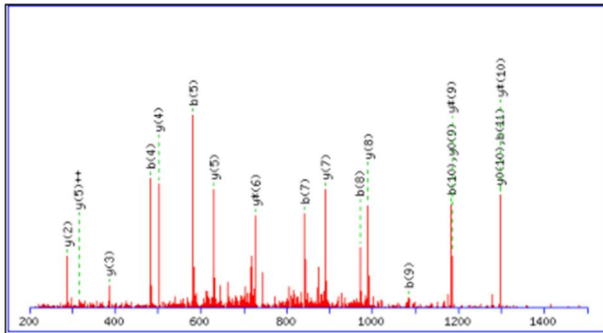

Monoisotopic mass of neutral peptide Mr(calc): 1469.8606

## Variable modifications:

K4 : Acetylated (K)

Ions Score: 48 Expect: 0.0021

Matches : 19/104 fragment ions using 26 most intense peaks ([help](#))

| #  | b         | b <sup>++</sup> | b <sup>+</sup> | b <sup>+++</sup> | b <sup>0</sup> | b <sup>0++</sup> | Seq | y         | y <sup>++</sup> | y <sup>+</sup> | y <sup>+++</sup> | y <sup>0</sup> | y <sup>0++</sup> | #  |
|----|-----------|-----------------|----------------|------------------|----------------|------------------|-----|-----------|-----------------|----------------|------------------|----------------|------------------|----|
| 1  | 58.0287   | 29.5180         |                |                  |                |                  | G   |           |                 |                |                  |                |                  | 12 |
| 2  | 157.0972  | 79.0522         |                |                  |                |                  | V   | 1413.8464 | 707.4268        | 1396.8199      | 698.9136         | 1395.8358      | 698.4216         | 11 |
| 3  | 270.1812  | 135.5942        |                |                  |                |                  | L   | 1314.7780 | 657.8926        | 1297.7514      | 649.3794         | 1296.7674      | 648.8874         | 10 |
| 4  | 482.2973  | 241.6523        | 465.2708       | 233.1390         |                |                  | K   | 1201.6939 | 601.3506        | 1184.6674      | 592.8373         | 1183.6834      | 592.3453         | 9  |
| 5  | 581.3657  | 291.1865        | 564.3392       | 282.6732         |                |                  | V   | 989.5778  | 495.2926        | 972.5513       | 486.7793         | 971.5673       | 486.2873         | 8  |
| 6  | 728.4341  | 364.7207        | 711.4076       | 356.2074         |                |                  | F   | 890.5094  | 445.7584        | 873.4829       | 437.2451         | 872.4989       | 436.7531         | 7  |
| 7  | 841.5182  | 421.2627        | 824.4917       | 412.7495         |                |                  | L   | 743.4410  | 372.2241        | 726.4145       | 363.7109         | 725.4304       | 363.2189         | 6  |
| 8  | 970.5608  | 485.7840        | 953.5342       | 477.2708         | 952.5502       | 476.7788         | E   | 630.3570  | 315.6821        | 613.3304       | 307.1688         | 612.3464       | 306.6768         | 5  |
| 9  | 1084.6037 | 542.8055        | 1067.5772      | 534.2922         | 1066.5932      | 533.8002         | N   | 501.3144  | 251.1608        | 484.2878       | 242.6475         |                |                  | 4  |
| 10 | 1183.6721 | 592.3397        | 1166.6456      | 583.8264         | 1165.6616      | 583.3344         | V   | 387.2714  | 194.1394        | 370.2449       | 185.6261         |                |                  | 3  |
| 11 | 1296.7562 | 648.8817        | 1279.7297      | 640.3685         | 1278.7456      | 639.8765         | I   | 288.2030  | 144.6051        | 271.1765       | 136.0919         |                |                  | 2  |
| 12 |           |                 |                |                  |                |                  | R   | 175.1190  | 88.0631         | 158.0924       | 79.5498          |                |                  | 1  |

H4K79

KacacTVTAMDVVYAL

Human HepG2 cells

K

MS/MS Fragmentation of **KTVTAMDVVYALK**

Found in **P62805**, Histone H4 OS=Homo sapiens OX=9606 GN=HIST1H4A PE=1 SV=2

Match to Query 13475: 1521.813848 from(761.914200,2+)

Title: File:20201204\_C12\_HepG2\_ingel\_3\_1.mzXML Scans:19477 RT:85.5885min Charge:2+ Fragmentation:cid

Data file 20201204\_C12\_HepG2\_ingel\_3\_1.mgf

Click mouse within plot area to zoom in by factor of two about that point

Or, Plot from 200 to 1600 Da Full range

Label all possible matches Label matches used for scoring

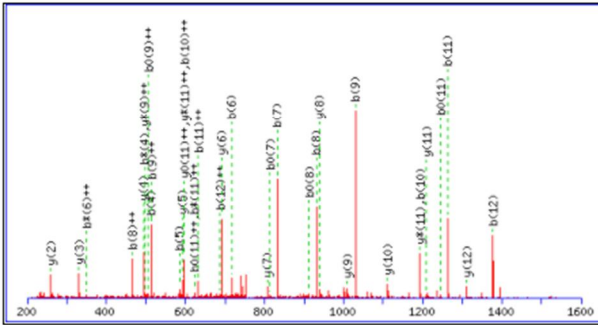

Monoisotopic mass of neutral peptide Mr(calc): 1521.8115

Variable modifications:

K1 : Acetylated (K)

Ions Score: 52 Expect: 0.00057

Matches : 37/130 fragment ions using 90 most intense peaks (help)

| #  | b         | b <sup>++</sup> | b <sup>*</sup> | b <sup>***</sup> | b <sup>0</sup> | b <sup>0++</sup> | Seq | y         | y <sup>++</sup> | y <sup>*</sup> | y <sup>***</sup> | y <sup>0</sup> | y <sup>0++</sup> | #  |
|----|-----------|-----------------|----------------|------------------|----------------|------------------|-----|-----------|-----------------|----------------|------------------|----------------|------------------|----|
| 1  | 213.1234  | 107.0653        | 196.0968       | 98.5520          |                |                  | K   |           |                 |                |                  |                |                  | 13 |
| 2  | 314.1710  | 157.5892        | 297.1445       | 149.0759         | 296.1605       | 148.5839         | T   | 1310.7025 | 655.8549        | 1293.6759      | 647.3416         | 1292.6919      | 646.8496         | 12 |
| 3  | 413.2395  | 207.1234        | 396.2129       | 198.6101         | 395.2289       | 198.1181         | V   | 1209.6548 | 605.3310        | 1192.6282      | 596.8178         | 1191.6442      | 596.3257         | 11 |
| 4  | 514.2871  | 257.6472        | 497.2606       | 249.1339         | 496.2766       | 248.6419         | T   | 1110.5864 | 555.7968        | 1093.5598      | 547.2835         | 1092.5758      | 546.7915         | 10 |
| 5  | 585.3243  | 293.1658        | 568.2977       | 284.6525         | 567.3137       | 284.1605         | A   | 1009.5387 | 505.2730        | 992.5121       | 496.7597         | 991.5281       | 496.2677         | 9  |
| 6  | 716.3647  | 358.6860        | 699.3382       | 350.1727         | 698.3542       | 349.6807         | M   | 938.5016  | 469.7544        | 921.4750       | 461.2411         | 920.4910       | 460.7491         | 8  |
| 7  | 831.3917  | 416.1995        | 814.3651       | 407.6862         | 813.3811       | 407.1942         | D   | 807.4611  | 404.2342        | 790.4345       | 395.7209         | 789.4505       | 395.2289         | 7  |
| 8  | 930.4601  | 465.7337        | 913.4335       | 457.2204         | 912.4495       | 456.7284         | V   | 692.4341  | 346.7207        | 675.4076       | 338.2074         |                |                  | 6  |
| 9  | 1029.5285 | 515.2679        | 1012.5020      | 506.7546         | 1011.5179      | 506.2626         | V   | 593.3657  | 297.1865        | 576.3392       | 288.6732         |                |                  | 5  |
| 10 | 1192.5918 | 596.7996        | 1175.5653      | 588.2863         | 1174.5813      | 587.7943         | Y   | 494.2973  | 247.6523        | 477.2708       | 239.1390         |                |                  | 4  |
| 11 | 1263.6290 | 632.3181        | 1246.6024      | 623.8048         | 1245.6184      | 623.3128         | A   | 331.2340  | 166.1206        | 314.2074       | 157.6074         |                |                  | 3  |
| 12 | 1376.7130 | 688.8601        | 1359.6865      | 680.3469         | 1358.7025      | 679.8549         | L   | 260.1969  | 130.6021        | 243.1703       | 122.0888         |                |                  | 2  |
| 13 |           |                 |                |                  |                |                  | K   | 147.1128  | 74.0600         | 130.0863       | 65.5468          |                |                  | 1  |
